# Supplementary material for: An analysis of mutational signatures of synonymous mutations across 15 cancer types
Source: Springer Nature journal article supplement (doi:10.1186/s12881-019-0926-4), 2019-12-01
Supplement: MOESM1 [file 12881_2019_926_MOESM1_ESM.pdf]

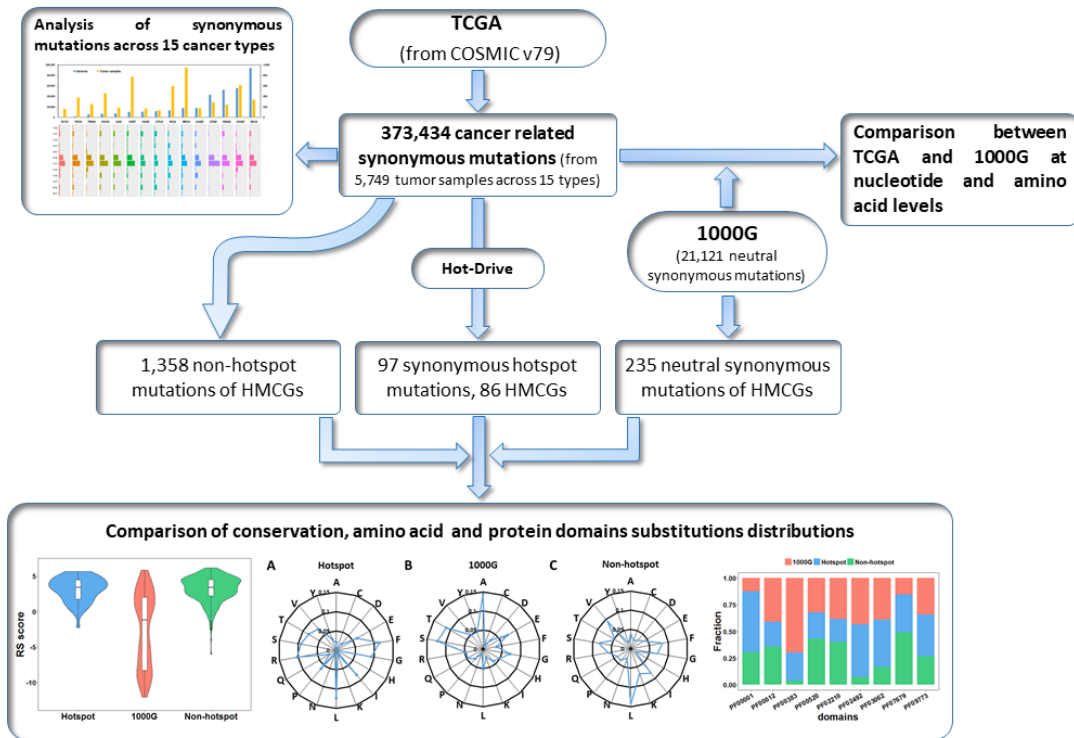

**Figure S1.** Illustration of analysis procedure of cancer associated synonymous mutations. Firstly, the distribution and mutational patterns of synonymous mutations from TCGA across 15 cancer types were investigated. Secondly, the comparison of synonymous mutational signatures between TCGA and 1000G at nucleotide and amino acid levels was made. Meanwhile, 97 hotspot mutations in 83 hotspot-mutation-containing-genes were nominated as potential drivers by considering the mutational rates across different mutational subtypes. And the common and diverse mutational signatures of hotspots, neutral synonymous mutations of HMCs in 1000G and non-hotspots of HMCs in TCGA were observed.

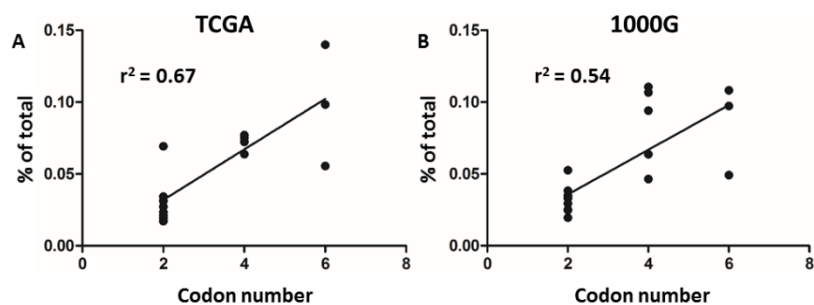

**Figure S2.** Correlation between percentages of synonymous mutations and codon numbers of amino acids in TCGA (A) and 1000G (B). The x-axis represents the codon numbers of amino acids and y-axis represents the percentage of synonymous mutations.

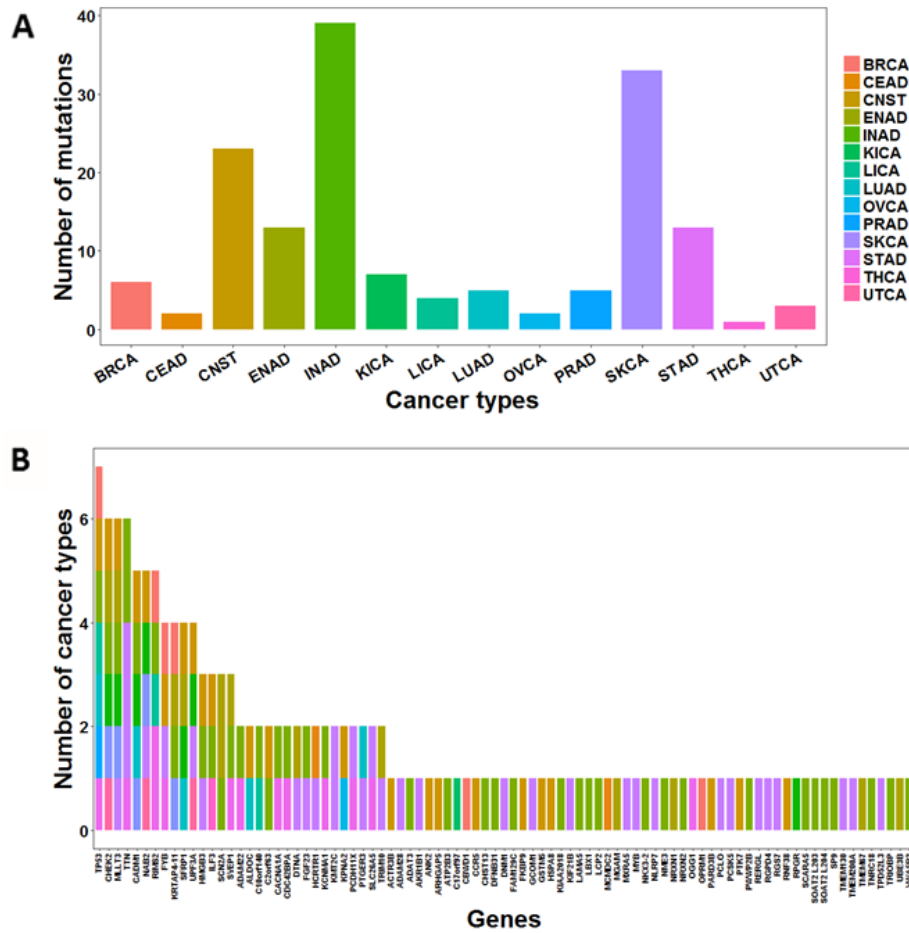

**Figure S3.** Distribution of synonymous hotspot mutations across cancer types (A) and genes (B). The color bar in panel B is corresponded to the cancer types in pane A.

**Table S1.** Synonymous codons of amino acids with optimal and non-optimal codons for human genome (Supek F, et al. Cell. 2014;156:1324-1335).

| AA             | Optimal codon | Non-optimal codon | AA             | Optimal codon | Non-optimal codon |
|----------------|---------------|-------------------|----------------|---------------|-------------------|
| <b>Leu (L)</b> | CTT<br>CTG    | CTA               | <b>Arg (R)</b> | CGT           | AGA               |
|                |               | CTC               |                |               | AGG               |
|                |               | TTA               |                |               | CGA               |
|                |               | TTG               |                |               | CGC               |
|                |               |                   |                |               | CGG               |
| <b>Ser (S)</b> | AGC<br>TCT    | AGT               | <b>Ala (A)</b> | GCT           | GCC               |
|                |               | TCA               |                |               | GCA               |
|                |               | TCC               |                |               | GCG               |
|                |               | TCG               |                |               |                   |
|                |               |                   |                |               |                   |

|                |     |                   |                |     |                   |
|----------------|-----|-------------------|----------------|-----|-------------------|
| <b>Gly (G)</b> | GGC | GGA<br>GGG<br>GGT | <b>Pro (P)</b> | CCT | CCA<br>CCC<br>CCG |
| <b>Thr (T)</b> | ACT | ACA<br>ACC<br>ACG | <b>Val (V)</b> | GTG | GTA<br>GTC<br>GTT |
| <b>Ile (I)</b> | ATT | ATA<br>ATC        | <b>Cys (C)</b> | TGC | TGT               |
| <b>Asp (D)</b> | GAC | GAT               | <b>Glu (E)</b> | -*  | GAA<br>GAG        |
| <b>Phe (F)</b> | TTC | TTT               | <b>His (H)</b> | CAC | CAG               |
| <b>Lys (K)</b> | -   | AAA<br>AAG        | <b>Asn (N)</b> | AAC | AAT               |
| <b>Gln (Q)</b> | -   | CAA<br>CAG        | <b>Tyr (Y)</b> | TAC | TAT               |

\* “-” represents amino acid without optimal codon.

**Table S2.** Hotspot synonymous mutations across different cancer types in TCGA dataset

| <b>Gene</b> | <b>AA position</b> | <b>Mutation n count</b> | <b>Mutation subtype</b> | <b>Mutation positions (GRCh37)</b> | <b>adj.p-value</b> | <b>Cancer type</b>                 |
|-------------|--------------------|-------------------------|-------------------------|------------------------------------|--------------------|------------------------------------|
| CHEK2       | S372               | 35                      | NC_CGts                 | 22:29091841C/T                     | 2.62E-29           | CNST, ENAD, KICA, INAD, PRAD, UTCA |
| TP53        | T125               | 28                      | NC_CGtv                 | 17:7579312G/T                      | 3.57E-20           | INAD, LICA, LUAD, OVCA             |
| TP53        | T125               | 28                      | NC_CGtv                 | 17:7579312G/C                      | 3.57E-20           | BRCA, STAD                         |
| FYB         | A2                 | 20                      | NC_CGts                 | 5:39203057G/A                      | 4.43E-15           | BRCA, CNST, SKCA, STAD             |
| MLLT3       | S168               | 21                      | NC_CGts                 | 9:20414340C/T                      | 7.11E-15           | CNST, ENAD, KICA, INAD, PRAD, SKCA |
| UPF3A       | L91                | 19                      | C_CGts                  | 13:115047559C/T                    | 9.44E-14           | CNST, KICA, SKCA, UTCA             |
| ANK2        | L1097              | 17                      | NC_CGts                 | 4:114254274C/T                     | 7.87E-13           | CNST                               |
| MXRA5       | G792               | 12                      | NC_CGts                 | X:3241350G/A                       | 8.30E-09           | SKCA                               |
| TTN         | P68                | 15                      | NC_CGts                 | 2:179666956C/T                     | 2.91E-07           | INAD, SKCA                         |
| FKBP9       | L496               | 13                      | NC_CGts                 | 7:33042403C/T                      | 1.76E-06           | CNST                               |
| TNRC18      | R1998              | 16                      | C_CGtv                  | 7:5372406C/A                       | 2.01E-06           | INAD                               |
| TTN         | P6                 | 14                      | NC_CGts                 | 2:179669352G/A                     | 2.10E-06           | INAD, STAD                         |
| SCN2A       | V1532              | 12                      | NC_CGtv                 | 2:166243300C/A                     | 5.85E-06           | ENAD, INAD                         |

|              |       |    |          |                     |          |                                    |
|--------------|-------|----|----------|---------------------|----------|------------------------------------|
| SCN2A        | V1532 | 12 | NC_CGts  | 2:166243300C/T      | 5.85E-06 | ENAD                               |
| CCR5         | I67   | 10 | NC_CGts  | 3:46414594C/T       | 1.03E-05 | CNST                               |
| C10orf140    | E422  | 12 | NC_CGts  | 10:21805486G/<br>A  | 1.05E-05 | INAD, LICA                         |
| C2orf63      | G39   | 8  | NC_CGtv  | 2:55449431C/A       | 1.89E-05 | CNST, INAD                         |
| KPNA2        | F17   | 10 | NC_CGts  | 17:66033299C/T      | 1.89E-05 | CNST, OVCA                         |
| PWWP2B       | E344  | 8  | C_CGts   | 10:134219036G/<br>A | 1.89E-05 | INAD                               |
| CADM1        | T343  | 11 | NC_CGtv  | 11:115080343C/<br>A | 2.58E-05 | CNST, KICA,<br>LUAD, PRAD,<br>INAD |
| ILF3         | N192  | 11 | NC_CGts  | 19:10789305C/T      | 2.58E-05 | CNST, INAD,<br>THCA                |
| SCARA5       | L153  | 10 | C_CGts   | 8:27779545G/A       | 3.65E-05 | INAD                               |
| TRIOBP       | S1295 | 9  | NC_CGts  | 22:38122448C/T      | 5.33E-05 | INAD                               |
| PTGER3       | I287  | 12 | C_CGts   | 1:71512400C/A       | 6.06E-05 | LUAD                               |
| PTGER3       | I287  | 12 | C_CGtv   | 1:71512400C/T       | 6.06E-05 | SKCA                               |
| TTN          | R606  | 12 | NC_CGts  | 2:179654825G/<br>A  | 1.02E-04 | SKCA                               |
| DFNB31       | V39   | 10 | C_CGts   | 9:117266965G/A      | 1.21E-04 | INAD                               |
| HSPA8        | G201  | 10 | ATts     | 11:122930698A/<br>G | 1.94E-04 | CNST                               |
| ADAM28       | G411  | 8  | NC_CGts  | 8:24188792G/A       | 2.75E-04 | SKCA                               |
| GSTM5        | D40   | 9  | NC_CGts  | 1:110255748C/T      | 4.67E-04 | CNST                               |
| VWA5B2       | A160  | 7  | NC_CGts  | 3:183951135C/T      | 5.05E-04 | INAD                               |
| LBX1         | R76   | 10 | C_CGts   | 10:102988345C/<br>T | 5.62E-04 | INAD                               |
| CDC42BP<br>A | S286  | 10 | NC_CGts  | 1:227335096G/<br>A  | 6.47E-04 | INAD, STAD                         |
| RNF38        | L147  | 8  | NC_CGts  | 9:36369845C/T       | 8.91E-04 | CNST                               |
| CHST13       | R71   | 8  | C_CGtv   | 3:126260608G/T      | 1.17E-03 | INAD                               |
| PCDH11X      | E799  | 10 | NC_CGts  | X:91133636G/A       | 1.24E-03 | SKCA, STAD                         |
| PCSK5        | R580  | 9  | NC_CGts  | 9:78784740G/A       | 1.37E-03 | SKCA                               |
| C17orf97     | T3    | 6  | C_CGtv   | 17:260142G/T        | 2.19E-03 | LIAD                               |
| KIAA2018     | Q1470 | 7  | NC_CGts  | 3:113376119G/A      | 2.19E-03 | INAD                               |
| RIMS2        | S201  | 10 | ATtv(10) | 8:104898096T/G      | 2.22E-03 | BRCA, INAD,<br>LICA, STAD          |
| RIMS2        | S201  | 10 | ATtv(10) | 8:104898096T/A      | 2.22E-03 | STAD                               |
| KCNMA1       | S504  | 12 | NC_CGts  | 10:78844406G/<br>A  | 2.93E-03 | INAD, STAD                         |
| SOAT2        | L203  | 7  | NC_CGtv  | 12:53509339G/T      | 3.06E-03 | INAD                               |
| PTK7         | I763  | 6  | NC_CGts  | 6:43112226C/T       | 3.16E-03 | CNST                               |
| KRTAP4-1     | P137  | 7  | NC_CGts  | 17:39274157C/T      | 3.31E-03 | BRCA, ENAD,<br>INAD, PRAD          |

1

|              |       |    |         |                    |          |                                    |  |
|--------------|-------|----|---------|--------------------|----------|------------------------------------|--|
| ATP2B3       | V864  | 6  | NC_CGtv | X:152823728G/<br>C | 4.81E-03 | INAD                               |  |
| TMEM200<br>A | R320  | 10 | NC_CGts | 6:130762527G/<br>A | 5.04E-03 | SKCA                               |  |
| LAMA5        | S191  | 6  | NC_CGts | 20:60927412C/T     | 5.53E-03 | INAD                               |  |
| CBWD1        | Y161  | 6  | ATts    | 9:163985T/C        | 6.21E-03 | BRCA                               |  |
| NKX3-2       | R83   | 7  | C_CGtv  | 4:13545792C/A      | 6.48E-03 | INAD                               |  |
| ARHGAP5      | K464  | 8  | ATts    | 14:32561267A/<br>G | 7.65E-03 | CNST                               |  |
| NME3         | V94   | 8  | ATtv    | 16:1820992A/T      | 7.65E-03 | INAD                               |  |
| SOAT2        | L204  | 7  | NC_CGts | 12:53509340C/T     | 7.88E-03 | INAD                               |  |
| NLRP7        | F333  | 6  | NC_CGts | 19:55451188C/T     | 7.96E-03 | SKCA                               |  |
| GCOM1        | R65   | 6  | NC_CGts | 15:57910263G/<br>A | 8.81E-03 | SKCA                               |  |
| HMGB3        | E192  | 9  | NC_CGts | X:150156360G/<br>A | 9.27E-03 | CNST, INAD,<br>SKCA                |  |
| CACNA1A      | F301  | 10 | NC_CGts | 19:13470495C/T     | 1.01E-02 | INAD, STAD                         |  |
| PCLO         | F4094 | 9  | NC_CGts | 7:82545020C/T      | 1.01E-02 | SKCA                               |  |
| DTNA         | F114  | 10 | NC_CGts | 18:32374194C/T     | 1.06E-02 | ENAD, SKCA                         |  |
| LCP2         | V188  | 6  | NC_CGts | 5:169695446G/<br>A | 1.24E-02 | INAD                               |  |
| RGPD4        | L1578 | 6  | NC_CGts | 2:108489194G/<br>A | 1.24E-02 | SKCA                               |  |
| ADAM22       | G356  | 8  | NC_CGts | 7:87762257C/T      | 1.27E-02 | INAD, STAD                         |  |
| HCRTR1       | F57   | 6  | NC_CGts | 1:32084964C/T      | 1.27E-02 | CEAD, SKCA                         |  |
| NAB2         | P211  | 7  | ATts    | 12:57485457T/C     | 1.27E-02 | CNST, KICA,<br>PRAD, SKCA,<br>UTCA |  |
| SFRP1        | G44   | 8  | C_CGtv  | 8:41166547C/A      | 1.47E-02 | CNST, ENAD,<br>KICA, LUAD          |  |
| SP9          | G162  | 6  | C_CGtv  | 2:175201299C/G     | 1.47E-02 | INAD                               |  |
| KMT2C        | T316  | 6  | NC_CGts | 7:151970854C/T     | 1.57E-02 | SKCA                               |  |
| KMT2C        | T316  | 6  | NC_CGtv | 7:151970854C/A     | 1.57E-02 | SKCA                               |  |
| ADAT3        | L298  | 5  | C_CGts  | 19:1912986C/T      | 1.81E-02 | INAD                               |  |
| SVEP1        | D1461 | 9  | NC_CGts | 9:113208197C/T     | 1.85E-02 | ENAD, INAD,<br>STAD                |  |
| ACTR3B       | F131  | 6  | ATts    | 7:152511691T/C     | 1.94E-02 | CNST                               |  |
| TMEM67       | I918  | 6  | NC_CGtv | 8:94822105C/A      | 1.98E-02 | ENAD                               |  |
| KIF21B       | E487  | 6  | C_CGts  | 1:200969850G/<br>A | 2.03E-02 | SKCA                               |  |
| AKR1B1       | F123  | 5  | NC_CGts | 7:134134532C/T     | 2.06E-02 | SKCA                               |  |
| OPRM1        | Y338  | 8  | ATts    | 6:154412457T/C     | 2.06E-02 | BRCA                               |  |
| TPD52L3      | R107  | 6  | NC_CGts | 9:6328916G/A       | 2.06E-02 | SKCA                               |  |
| TTN          | I1774 | 9  | NC_CGts | 2:179641269C/T     | 2.06E-02 | SKCA                               |  |

|         |       |    |         |                     |          |            |
|---------|-------|----|---------|---------------------|----------|------------|
| NRXN2   | G177  | 7  | C_CGts  | 11:64480641C/T      | 2.10E-02 | INAD       |
| TP53    | E224  | 8  | NC_CGts | 17:7578177G/A       | 2.31E-02 | CNST       |
| RGS7    | F347  | 9  | NC_CGts | 1:240975259C/T      | 2.47E-02 | SKCA       |
| RPGR    | T51   | 4  | NC_CGts | X:38182653C/T       | 3.10E-02 | KICA       |
| MYB     | I376  | 6  | NC_CGts | 6:135517065C/T      | 3.19E-02 | SKCA       |
| PARD3B  | G308  | 6  | ATts    | 2:205986432T/C      | 3.19E-02 | CNST       |
| TMEM130 | F265  | 6  | NC_CGts | 7:98452871C/T       | 3.19E-02 | SKCA       |
| MGAM    | T1114 | 8  | NC_CGtv | 7:141755385C/A      | 3.30E-02 | ENAD       |
| DNM1    | I395  | 6  | NC_CGts | 9:130985128C/T      | 3.43E-02 | SKCA       |
| ALDOC   | L257  | 5  | NC_CGts | 17:26901115C/T      | 3.58E-02 | CNST, LUAD |
| NRXN1   | S211  | 12 | C_CGts  | 2:51254779C/T       | 3.58E-02 | ENAD       |
| SLC26A5 | V210  | 6  | NC_CGts | 7:103050937C/T      | 3.58E-02 | SKCA, STAD |
| FAM129C | Q502  | 4  | NC_CGts | 19:17654209G/<br>A  | 3.65E-02 | INAD       |
| MCMD2   | Y319  | 4  | NC_CGts | 8:67796113C/T       | 3.76E-02 | CEAD       |
| RERGL   | R202  | 6  | NC_CGts | 12:18234137G/<br>A  | 3.79E-02 | SKCA       |
| UBE3B   | L83   | 7  | NC_CGts | 12:109921751C/<br>T | 3.87E-02 | ENAD       |
| FGF23   | F108  | 5  | C_CGts  | 12:4479941C/T       | 4.03E-02 | INAD, SKCA |
| OGG1    | L201  | 5  | NC_CGtv | 3:9796425G/C        | 4.83E-02 | STAD       |
| TRIM10  | P71   | 6  | NC_CGts | 6:30128423C/A       | 4.83E-02 | ENAD       |
| TRIM10  | P71   | 6  | NC_CGtv | 6:30128423C/T       | 4.83E-02 | SKCA       |
