# Supplementary material for: An analysis of mutational signatures of synonymous mutations across 15 cancer types
Source: BMC Med Genet. 2019 Dec 9;20(Suppl 2):190. doi: 10.1186/s12881-019-0926-4 (PMC6900878; doi:10.1186/s12881-019-0926-4)
Supplement: Supplementary file 2 — Additional file 2: Table S3. List of neutral synonymous mutations of HMCGs in 1000G dataset. [file 12881_2019_926_MOESM2_ESM.xlsx]

## Sheet: Neutral synonymous mutations
Additional file 2: Table S3 List of neutral synonymous mutations of HMCGs in 1000G dataset
Gene	Mutation position (GRCh 37)	Nucleotide change	AA position	Transcript ID
ADAM28	8:24171051	c.534C>T	H178	ENST00000520448
ADAM28	8:24188804	c.1245G>A	V415	ENST00000265769
ADAM28	8:24207399	c.2013G>C	V671	ENST00000265769
ADAT3	19:1912986	c.940C>T	L314	ENST00000329478
ADAT3	19:1912934	c.888T>C	T296	ENST00000329478
ADAT3	19:1912817	c.771C>T	Y257	ENST00000329478
ANK2	4:114275942	c.6168C>G	L2056	ENST00000357077
ANK2	4:114276884	c.7110A>G	Q2370	ENST00000357077
ANK2	4:114257201	c.3579C>T	R1193	ENST00000357077
ANK2	4:114294308	c.11673T>C	H3891	ENST00000357077
ANK2	4:114279422	c.9648A>G	E3216	ENST00000357077
ATP2B3	X:152830495	c.3276T>C	H1092	ENST00000263519
ATP2B3	X:152815089	c.1473A>G	G491	ENST00000263519
ATP2B3	X:152823728	c.2592G>C	V864	ENST00000263519
C17orf97	17:263387	c.753T>C	A251	ENST00000360127
C17orf97	17:260182	c.49T>C	L17	ENST00000360127
C17orf97	17:260142	c.9G>T	T3	ENST00000360127
C17orf97	17:263441	c.807T>C	P269	ENST00000360127
CACNA1A	19:13414594	c.2091G>A	T697	ENST00000360228
CACNA1A	19:13470522	c.876A>G	E292	ENST00000360228
CACNA1A	19:13445208	c.1182G>A	E394	ENST00000360228
CACNA1A	19:13387904	c.3861T>C	F1287	ENST00000360228
CBWD1	9:178937	c.33G>A	E11	ENST00000356521
CBWD1	9:154795	c.576A>G	R192	ENST00000356521
CDC42BPA	1:227182575	c.5163T>C	S1721	ENST00000334218
CDC42BPA	1:227216662	c.4023A>G	K1341	ENST00000334218
CDC42BPA	1:227504794	c.90A>G	T30	ENST00000334218
CHST13	3:126261202	c.807G>A	T269	ENST00000319340
CHST13	3:126260608	c.213G>T	R71	ENST00000319340
CHST13	3:126260995	c.600C>T	Y200	ENST00000319340
DFNB31	9:117186677	c.1353T>C	G451	ENST00000362057
DFNB31	9:117266965	c.117G>A	V39	ENST00000362057
DFNB31	9:117166311	c.2283C>T	S761	ENST00000362057
FAM129C	19:17641667	c.159G>A	P53	ENST00000600519
FAM129C	19:17654182	c.1386G>A	T462	ENST00000600519
FAM129C	19:17651370	c.1149A>G	S383	ENST00000600519
FYB	5:39134417	c.1740C>T	D580	ENST00000540520
FYB	5:39141240	c.1326C>T	S442	ENST00000540520
GCOM1	15:57967219	c.1164T>C	T388	ENST00000468886
GCOM1	15:57918069	c.411A>G	A137	ENST00000468886
GCOM1	15:58000981	c.1374C>T	A458	ENST00000587652
GSTM5	1:110257835	c.597C>T	N199	ENST00000369812
GSTM5	1:110257836	c.598T>C	L200	ENST00000369812
HCRTR1	1:32084904	c.111C>T	R37	ENST00000373706
HSPA8	11:122929407	c.1455A>C	I485	ENST00000227378
HSPA8	11:122928622	c.1761T>C	A587	ENST00000227378
ILF3	19:10794630	c.2055G>T	S685	ENST00000449870
KCNMA1	10:78944590	c.687C>T	F229	ENST00000404771
KIAA2018	3:113377361	c.3168T>C	N1056	ENST00000316407
KIAA2018	3:113377505	c.3024A>C	L1008	ENST00000316407
KIF21B	1:200959302	c.2994C>T	D998	ENST00000422435
KIF21B	1:200959305	c.2991C>T	T997	ENST00000422435
KIF21B	1:200945910	c.4437C>T	Y1479	ENST00000422435
KIF21B	1:200967687	c.1902G>C	A634	ENST00000422435
KIF21B	1:200978412	c.246G>A	T82	ENST00000422435
KIF21B	1:200971353	c.1338T>C	D446	ENST00000422435
KIF21B	1:200956288	c.3450T>C	A1150	ENST00000422435
KMT2C	7:151874498	c.8040G>A	Q2680	ENST00000355193
KMT2C	7:151873853	c.8685G>A	Q2895	ENST00000355193
KPNA2	17:66039350	c.801A>G	V267	ENST00000330459
LAMA5	20:60887468	c.843C>T	T281	ENST00000370691
LAMA5	20:60897488	c.6183C>T	F2061	ENST00000252999
LAMA5	20:60892526	c.7386T>C	D2462	ENST00000252999
LAMA5	20:60907446	c.3534A>G	E1178	ENST00000252999
LAMA5	20:60937597	c.309T>C	C103	ENST00000252999
LAMA5	20:60937516	c.390T>C	S130	ENST00000252999
LAMA5	20:60909060	c.2775T>C	P925	ENST00000252999
LAMA5	20:60912683	c.2127A>G	T709	ENST00000252999
LAMA5	20:60908964	c.2871C>T	C957	ENST00000252999
LAMA5	20:60926828	c.888C>T	I296	ENST00000252999
LAMA5	20:60907675	c.3381C>T	A1127	ENST00000252999
LAMA5	20:60913127	c.1836T>C	A612	ENST00000252999
LAMA5	20:60893639	c.7110C>G	T2370	ENST00000252999
LAMA5	20:60927412	c.573C>T	S191	ENST00000252999
LAMA5	20:60927349	c.636G>A	A212	ENST00000252999
LAMA5	20:60903419	c.4530G>A	L1510	ENST00000252999
LAMA5	20:60900579	c.5322G>T	T1774	ENST00000252999
LAMA5	20:60920887	c.1464C>T	A488	ENST00000252999
LBX1	10:102988345	c.228C>T	R76	ENST00000370193
LCP2	5:169685163	c.978G>A	Q326	ENST00000046794
LCP2	5:169695446	c.564G>A	V188	ENST00000046794
MGAM	7:141755358	c.3315T>C	I1105	ENST00000475668
MGAM	7:141752213	c.2925C>A	A975	ENST00000475668
MGAM	7:141759274	c.3822T>C	D1274	ENST00000475668
MGAM	7:141796131	c.7608G>A	E2536	ENST00000475668
MGAM	7:141759340	c.3888T>C	A1296	ENST00000475668
MGAM	7:141724852	c.885C>T	N295	ENST00000475668
MGAM	7:141759676	c.3969T>C	N1323	ENST00000475668
MLLT3	9:20414343	c.501T>C	S167	ENST00000380338
MLLT3	9:20414376	c.468T>C	S156	ENST00000380338
MXRA5	X:3241317	c.2409A>G	P803	ENST00000217939
MXRA5	X:3239979	c.3747C>T	S1249	ENST00000217939
MXRA5	X:3241710	c.2016G>A	G672	ENST00000217939
MXRA5	X:3238167	c.5559A>C	P1853	ENST00000217939
MXRA5	X:3228096	c.8148G>A	E2716	ENST00000217939
MXRA5	X:3228420	c.7824G>A	S2608	ENST00000217939
MXRA5	X:3241050	c.2676C>T	S892	ENST00000217939
MXRA5	X:3241284	c.2442T>C	S814	ENST00000217939
MXRA5	X:3241791	c.1935C>T	D645	ENST00000217939
MXRA5	X:3228411	c.7833C>T	A2611	ENST00000217939
MXRA5	X:3228663	c.7581C>G	A2527	ENST00000217939
MXRA5	X:3236028	c.5694G>A	P1898	ENST00000217939
MXRA5	X:3228675	c.7569G>A	E2523	ENST00000217939
MXRA5	X:3228891	c.7353T>C	T2451	ENST00000217939
NKX3-2	4:13545792	c.247C>A	R83	ENST00000382438
NLRP7	19:55441995	c.2682T>C	Y894	ENST00000586379
NLRP7	19:55451797	c.390G>A	Q130	ENST00000586379
NLRP7	19:55450696	c.1491C>T	I497	ENST00000586379
NLRP7	19:55441902	c.2775A>G	A925	ENST00000586379
NLRP8	19:56467281	c.1857A>G	E619	ENST00000291971
NLRP8	19:56477687	c.2322A>G	K774	ENST00000291971
NLRP8	19:56459367	c.99C>T	P33	ENST00000291971
NLRP8	19:56473460	c.2070T>C	R690	ENST00000291971
NLRP8	19:56490778	c.2895C>T	F965	ENST00000291971
NLRP9	19:56249672	c.69T>C	F23	ENST00000332836
NLRP9	19:56241265	c.1926T>C	L642	ENST00000332836
NME3	16:1820992	c.282A>T	V94	ENST00000219302
NRXN1	2:51254901	c.511C>T	L171	ENST00000404971
NRXN2	11:64418900	c.2745C>T	I915	ENST00000265459
NRXN2	11:64480641	c.531C>T	G177	ENST00000265459
NRXN2	11:64415767	c.3327C>T	G1109	ENST00000265459
OPRM1	6:154414563	c.1323A>G	G441	ENST00000229768
OPRM1	6:154414573	c.1333C>T	L445	ENST00000229768
PARD3B	2:205829991	c.339C>T	A113	ENST00000406610
PARD3B	2:206364737	c.3162T>C	S1054	ENST00000406610
PARD3B	2:205990353	c.1326C>T	T442	ENST00000406610
PARD3B	2:205986321	c.813A>G	Q271	ENST00000406610
PCDH11X	X:91090533	c.30C>T	F10	ENST00000373094
PCLO	7:82435033	c.14904G>A	G4968	ENST00000333891
PCLO	7:82544987	c.12315T>C	H4105	ENST00000333891
PCLO	7:82595324	c.3780G>A	Q1260	ENST00000333891
PCSK5	9:78942956	c.4290A>G	S1430	ENST00000545128
PCSK5	9:78506145	c.48G>A	L16	ENST00000545128
PCSK5	9:78506187	c.90T>C	C30	ENST00000545128
PCSK5	9:78773953	c.1485G>A	S495	ENST00000545128
PCSK5	9:78803512	c.2301C>T	C767	ENST00000545128
PTGER3	1:71512643	c.618G>T	T206	ENST00000497146
PTK7	6:43109751	c.1851G>A	G617	ENST00000230418
PWWP2B	10:134218532	c.528G>C	V176	ENST00000305233
PWWP2B	10:134219036	c.1032G>A	E344	ENST00000305233
PWWP2B	10:134219045	c.1041C>T	P347	ENST00000305233
RGPD4	2:108487829	c.3369G>C	L1123	ENST00000354986
RGPD4	2:108487877	c.3417T>C	D1139	ENST00000354986
RGPD4	2:108487826	c.3366C>T	P1122	ENST00000354986
RGPD4	2:108487901	c.3441A>G	L1147	ENST00000354986
RGPD4	2:108455303	c.288G>T	L96	ENST00000354986
RIMS2	8:105263979	c.4035C>T	A1345	ENST00000436393
RIMS2	8:105261725	c.3654G>A	Q1218	ENST00000436393
RPGR	X:38158290	c.1164G>A	A388	ENST00000482855
RPGR	X:38144988	c.3264G>A	V1088	ENST00000378505
RPGR	X:38146029	c.2223G>A	E741	ENST00000378505
RPGR	X:38145033	c.3219C>T	G1073	ENST00000378505
RPGR	X:38144856	c.3396C>T	N1132	ENST00000378505
SCARA5	8:27737198	c.1239T>C	R413	ENST00000354914
SCARA5	8:27779545	c.459G>A	L153	ENST00000354914
SCARA5	8:27737180	c.1257C>T	D419	ENST00000354914
SCARA5	8:27729532	c.1407C>T	I469	ENST00000354914
SCN2A	2:166245230	c.4914T>A	R1638	ENST00000283256
SOAT2	12:53509339	c.609G>T	L203	ENST00000542365
SOAT2	12:53509340	c.610C>T	L204	ENST00000542365
SP9	2:175201299	c.486C>G	G162	ENST00000394967
SP9	2:175200903	c.90G>C	T30	ENST00000394967
SVEP1	9:113166697	c.9576A>T	V3192	ENST00000401783
SVEP1	9:113169630	c.8250A>G	A2750	ENST00000401783
SVEP1	9:113163239	c.9717T>G	V3239	ENST00000401783
SVEP1	9:113169126	c.8754C>T	H2918	ENST00000401783
SVEP1	9:113148239	c.10176C>T	G3392	ENST00000401783
SVEP1	9:113233720	c.2922C>T	A974	ENST00000401783
SVEP1	9:113220820	c.3507G>A	A1169	ENST00000401783
TMEM130	7:98460824	c.285G>T	V95	ENST00000416379
TMEM200A	6:130761798	c.231T>C	A77	ENST00000296978
TMEM200A	6:130761957	c.390A>G	P130	ENST00000296978
TMEM200A	6:130761804	c.237C>T	A79	ENST00000296978
TMEM67	8:94827660	c.2862A>C	T954	ENST00000323130
TNRC18	7:5410904	c.3321G>C	A1107	ENST00000399537
TNRC18	7:5353061	c.7461G>A	P2487	ENST00000399537
TNRC18	7:5399044	c.4818G>C	S1606	ENST00000399537
TNRC18	7:5427517	c.1938C>T	G646	ENST00000399537
TNRC18	7:5410916	c.3309C>G	A1103	ENST00000399537
TNRC18	7:5347749	c.8895C>T	P2965	ENST00000399537
TNRC18	7:5434135	c.279T>C	S93	ENST00000399537
TNRC18	7:5427652	c.1803C>T	A601	ENST00000399537
TNRC18	7:5347914	c.8730C>T	D2910	ENST00000399537
TNRC18	7:5353253	c.7269C>A	A2423	ENST00000399537
TNRC18	7:5372406	c.5994C>A	R1998	ENST00000399537
TRIM10	6:30122154	c.1038A>G	Q346	ENST00000449742
TRIOBP	22:38164106	c.6498C>T	Y2166	ENST00000406386
TRIOBP	22:38129332	c.3975G>A	Q1325	ENST00000406386
TRIOBP	22:38120303	c.1740C>A	A580	ENST00000406386
TRIOBP	22:38122448	c.3885C>T	S1295	ENST00000406386
TTN	2:179447848	c.65682A>G	T21894	ENST00000589042
TTN	2:179435337	c.75522A>C	A25174	ENST00000589042
TTN	2:179579822	c.26091A>T	L8697	ENST00000589042
TTN	2:179440029	c.70830C>T	S23610	ENST00000589042
TTN	2:179462494	c.57315T>C	H19105	ENST00000589042
TTN	2:179580434	c.25707T>C	Y8569	ENST00000589042
TTN	2:179479245	c.48996G>A	E16332	ENST00000589042
TTN	2:179631214	c.9597A>G	E3199	ENST00000589042
TTN	2:179395760	c.105582C>T	S35194	ENST00000589042
TTN	2:179454394	c.62058T>C	Y20686	ENST00000589042
TTN	2:179398823	c.102519C>T	G34173	ENST00000589042
TTN	2:179395958	c.105384A>G	A35128	ENST00000589042
TTN	2:179600563	c.14610C>T	S4870	ENST00000589042
TTN	2:179431797	c.79062T>A	G26354	ENST00000589042
TTN	2:179395067	c.106275G>C	G35425	ENST00000589042
TTN	2:179416556	c.91071T>G	T30357	ENST00000589042
TTN	2:179629363	c.9879A>G	E3293	ENST00000589042
TTN	2:179413110	c.93243C>T	A31081	ENST00000589042
TTN	2:179615994	c.11133A>G	T3711	ENST00000360870
TTN	2:179647546	c.3087T>C	Y1029	ENST00000589042
TTN	2:179455207	c.61245A>G	T20415	ENST00000589042
TTN	2:179498303	c.42783A>G	K14261	ENST00000589042
TTN	2:179638238	c.7545C>T	Y2515	ENST00000589042
TTN	2:179443540	c.68217T>C	H22739	ENST00000589042
TTN	2:179605705	c.12255T>C	I4085	ENST00000589042
TTN	2:179583317	c.24516C>T	T8172	ENST00000589042
TTN	2:179650701	c.2244G>A	E748	ENST00000589042
TTN	2:179587546	c.22080T>C	D7360	ENST00000589042
TTN	2:179578730	c.26655C>T	S8885	ENST00000589042
TTN	2:179579212	c.26289A>G	E8763	ENST00000589042
TTN	2:179644160	c.3759A>G	R1253	ENST00000589042
TTN	2:179421609	c.88272G>A	E29424	ENST00000589042
TTN	2:179477717	c.49731T>C	H16577	ENST00000589042
TTN	2:179396354	c.104988C>T	V34996	ENST00000589042
TTN	2:179575949	c.28014C>A	G9338	ENST00000589042
TTN	2:179604742	c.13218C>T	A4406	ENST00000589042
TTN	2:179585266	c.23223G>A	Q7741	ENST00000589042
TTN	2:179543217	c.33834G>A	E11278	ENST00000589042
TTN	2:179633644	c.8919C>G	S2973	ENST00000589042
TTN	2:179574384	c.28662G>A	R9554	ENST00000589042
TTN	2:179427186	c.83673T>C	G27891	ENST00000589042
TTN	2:179569400	c.29799G>A	S9933	ENST00000589042
TTN	2:179569436	c.29763T>C	I9921	ENST00000589042
TTN	2:179614952	c.12175T>C	L4059	ENST00000360870
UBE3B	12:109968427	c.2886C>T	S962	ENST00000342494
	:
