# Supplementary material for: An analysis of mutational signatures of synonymous mutations across 15 cancer types
Source: BMC Med Genet. 2019 Dec 9;20(Suppl 2):190. doi: 10.1186/s12881-019-0926-4 (PMC6900878; doi:10.1186/s12881-019-0926-4)
Supplement: Supplementary file 3 — Additional file 3: Table S4. List of non-hotspot synonymous mutations of HMCGs in TCAGA dataset. [file 12881_2019_926_MOESM3_ESM.xlsx]

## Sheet: Non-hotspot synonymous mutation
Additional file 3: Table S4 List of non-hotspot synonymous mutations of HMCGs in TCAGA dataset.
Gene	Mutation position (GRCh 37)	Nucleotide change	AA position	Transcript ID
ACTR3B	7:152520588	c.846C>T	F282	ENST00000256001
ACTR3B	7:152497740	c.225G>A	K75	ENST00000256001
ACTR3B	7:152551575	c.1194G>A	K398	ENST00000256001
ADAM22	7:87825800	c.2715C>T	S905	ENST00000265727
ADAM22	7:87762260	c.1071G>C	V357	ENST00000265727
ADAM22	7:87797453	c.2193T>C	G731	ENST00000265727
ADAM22	7:87808310	c.2361C>T	D787	ENST00000265727
ADAM22	7:87763727	c.1161A>G	L387	ENST00000265727
ADAM22	7:87808295	c.2346C>T	D782	ENST00000265727
ADAM22	7:87811337	c.2574T>C	T858	ENST00000265727
ADAM22	7:87810862	c.2451C>T	D817	ENST00000265727
ADAM22	7:87762239	c.1050G>A	S350	ENST00000265727
ADAM22	7:87760739	c.981T>C	V327	ENST00000265727
ADAM22	7:87785277	c.1863C>T	I621	ENST00000265727
ADAM22	7:87763712	c.1146A>G	S382	ENST00000265727
ADAM22	7:87792381	c.1962G>A	G654	ENST00000265727
ADAM22	7:87757967	c.729G>C	L243	ENST00000265727
ADAM28	8:24190190	c.1299C>T	C433	ENST00000265769
ADAM28	8:24199240	c.1800G>T	V600	ENST00000265769
ADAM28	8:24187611	c.1086G>A	V362	ENST00000265769
ADAT3	19:1912986	c.892C>T	L298	ENST00000329478
AKR1B1	7:134134532	c.369C>T	F123	ENST00000285930
ALDOC	17:26902293	c.172C>T	L58	ENST00000395321
ALDOC	17:26902186	c.279C>T	P93	ENST00000395321
ALDOC	17:26902512	c.39G>A	K13	ENST00000395321
ANK2	4:114195739	c.1617G>A	R539	ENST00000357077
ANK2	4:114279032	c.9258G>A	R3086	ENST00000357077
ANK2	4:114095619	c.132G>A	L44	ENST00000357077
ANK2	4:114276464	c.6690C>T	S2230	ENST00000357077
ANK2	4:114260443	c.3858T>C	N1286	ENST00000357077
ANK2	4:114275765	c.5991C>T	F1997	ENST00000357077
ANK2	4:114284516	c.10779C>T	F3593	ENST00000357077
ANK2	4:114282001	c.10704G>A	R3568	ENST00000357077
ANK2	4:114279170	c.9396C>T	F3132	ENST00000357077
ANK2	4:114257063	c.3441C>T	F1147	ENST00000357077
ANK2	4:114120241	c.360A>T	G120	ENST00000357077
ANK2	4:114158196	c.537G>C	V179	ENST00000357077
ANK2	4:114284612	c.10875G>A	G3625	ENST00000357077
ANK2	4:114279695	c.9921G>A	R3307	ENST00000357077
ANK2	4:114294455	c.11709C>T	I3903	ENST00000357077
ANK2	4:114179525	c.1344C>T	L448	ENST00000357077
ANK2	4:114288885	c.11196G>A	E3732	ENST00000357077
ANK2	4:114214640	c.2421C>T	I807	ENST00000357077
ANK2	4:114286226	c.10920C>T	I3640	ENST00000357077
ANK2	4:114286205	c.10899C>T	L3633	ENST00000357077
ANK2	4:114278657	c.8883T>C	S2961	ENST00000357077
ANK2	4:114195727	c.1605C>T	H535	ENST00000357077
ANK2	4:114163300	c.826A>C	R276	ENST00000357077
ARHGAP5	14:32561597	c.1722T>C	S574	ENST00000345122
ARHGAP5	14:32561618	c.1743T>C	H581	ENST00000345122
ARHGAP5	14:32559968	c.93A>G	G31	ENST00000345122
ARHGAP5	14:32560511	c.636T>G	V212	ENST00000345122
ARHGAP5	14:32561114	c.1239C>T	V413	ENST00000345122
ARHGAP5	14:32619205	c.4041A>G	P1347	ENST00000345122
ARHGAP5	14:32615470	c.3867G>C	G1289	ENST00000345122
ARHGAP5	14:32562906	c.3031A>C	R1011	ENST00000345122
ARHGAP5	14:32561408	c.1533T>C	S511	ENST00000345122
ARHGAP5	14:32560526	c.651A>G	S217	ENST00000345122
ARHGAP5	14:32561666	c.1791C>T	N597	ENST00000345122
ARHGAP5	14:32623920	c.4275A>G	R1425	ENST00000345122
ARHGAP5	14:32562668	c.2793T>C	F931	ENST00000345122
ARHGAP5	14:32562839	c.2964A>G	P988	ENST00000345122
ARHGAP5	14:32562188	c.2313G>A	K771	ENST00000345122
ARHGAP5	14:32563175	c.3300A>G	K1100	ENST00000345122
ATP2B3	X:152815583	c.1662G>A	L554	ENST00000263519
ATP2B3	X:152808574	c.864C>T	I288	ENST00000263519
ATP2B3	X:152845458	c.3519G>A	P1173	ENST00000359149
ATP2B3	X:152815646	c.1725C>T	T575	ENST00000349466
ATP2B3	X:152835090	c.3372C>T	S1124	ENST00000359149
ATP2B3	X:152818709	c.2040G>A	E680	ENST00000263519
ATP2B3	X:152823611	c.2475C>T	I825	ENST00000263519
ATP2B3	X:152801762	c.57G>A	R19	ENST00000263519
ATP2B3	X:152818565	c.1896G>A	R632	ENST00000263519
ATP2B3	X:152825250	c.2689C>T	L897	ENST00000263519
ATP2B3	X:152821867	c.2317C>T	L773	ENST00000263519
C10orf140	10:21805345	c.1407C>T	T469	ENST00000449193
C10orf140	10:21806653	c.99C>T	F33	ENST00000449193
C10orf140	10:21804079	c.2673C>T	G891	ENST00000449193
C10orf140	10:21805147	c.1605G>A	P535	ENST00000449193
C10orf140	10:21804166	c.2586G>T	G862	ENST00000449193
C10orf140	10:21804178	c.2574T>A	I858	ENST00000449193
C10orf140	10:21804708	c.2044C>T	L682	ENST00000449193
C17orf97	17:260142	c.9G>T	T3	ENST00000360127
C2orf63	2:55449431	c.117C>A	G39	ENST00000407122
CACNA1A	19:13339552	c.5589C>T	L1863	ENST00000325084
CACNA1A	19:13370401	c.4365G>A	V1455	ENST00000360228
CACNA1A	19:13370458	c.4308G>A	K1436	ENST00000360228
CACNA1A	19:13355996	c.4950G>A	G1650	ENST00000360228
CACNA1A	19:13445202	c.1188C>A	I396	ENST00000360228
CACNA1A	19:13428089	c.1392C>T	N464	ENST00000360228
CACNA1A	19:13370418	c.4348C>T	L1450	ENST00000360228
CACNA1A	19:13340964	c.5460C>A	S1820	ENST00000360228
CACNA1A	19:13370431	c.4338G>A	V1446	ENST00000357018
CACNA1A	19:13366050	c.4614C>A	I1538	ENST00000360228
CACNA1A	19:13325357	c.5797C>T	L1933	ENST00000360228
CACNA1A	19:13476147	c.768C>T	C256	ENST00000357018
CACNA1A	19:13368242	c.4515C>A	I1505	ENST00000325084
CACNA1A	19:13423567	c.1587C>A	L529	ENST00000325084
CACNA1A	19:13419337	c.1677C>A	I559	ENST00000357018
CACNA1A	19:13428092	c.1389G>A	E463	ENST00000360228
CACNA1A	19:13427954	c.1527C>T	N509	ENST00000360228
CACNA1A	19:13397441	c.3429C>T	S1143	ENST00000360228
CACNA1A	19:13397387	c.3483G>A	R1161	ENST00000360228
CACNA1A	19:13409936	c.2511G>A	K837	ENST00000360228
CACNA1A	19:13427930	c.1551C>T	F517	ENST00000360228
CACNA1A	19:13419008	c.1839C>T	I613	ENST00000360228
CACNA1A	19:13323213	c.6174C>T	S2058	ENST00000360228
CACNA1A	19:13428095	c.1386G>A	L462	ENST00000360228
CACNA1A	19:13365996	c.4668C>T	Y1556	ENST00000360228
CACNA1A	19:13445274	c.1116C>T	N372	ENST00000360228
CACNA1A	19:13414615	c.2070C>T	S690	ENST00000360228
CACNA1A	19:13340940	c.5484G>A	L1828	ENST00000360228
CACNA1A	19:13394186	c.3717C>T	I1239	ENST00000360228
CACNA1A	19:13446673	c.1029C>T	L343	ENST00000360228
CACNA1A	19:13322932	c.6288C>T	L2096	ENST00000360228
CACNA1A	19:13386683	c.3970C>T	L1324	ENST00000360228
CACNA1A	19:13423582	c.1569C>T	F523	ENST00000360228
CACNA1A	19:13563773	c.456C>T	I152	ENST00000360228
CACNA1A	19:13445223	c.1167C>T	L389	ENST00000360228
CACNA1A	19:13414696	c.1989C>T	I663	ENST00000360228
CACNA1A	19:13372361	c.4153C>T	L1385	ENST00000360228
CACNA1A	19:13409876	c.2571C>T	F857	ENST00000360228
CACNA1A	19:13323306	c.6081C>T	S2027	ENST00000360228
CACNA1A	19:13414693	c.1992G>A	L664	ENST00000360228
CACNA1A	19:13470507	c.891G>A	G297	ENST00000360228
CACNA1A	19:13411423	c.2220G>A	Q740	ENST00000360228
CADM1	11:115047275	c.1248C>T	D416	ENST00000452722
CADM1	11:115047299	c.1224T>C	T408	ENST00000452722
CADM1	11:115099935	c.619C>T	L207	ENST00000452722
CADM1	11:115085443	c.879G>C	L293	ENST00000452722
CADM1	11:115111039	c.226C>T	L76	ENST00000452722
CADM1	11:115102104	c.531C>T	I177	ENST00000452722
CADM1	11:115099882	c.672C>T	H224	ENST00000452722
CBWD1	9:163985	c.483T>C	Y161	ENST00000356521
CCR5	3:46414621	c.228C>T	D76	ENST00000343801
CCR5	3:46415077	c.684G>A	K228	ENST00000343801
CCR5	3:46415098	c.705G>A	R235	ENST00000343801
CDC42BPA	1:227219069	c.3600C>G	V1200	ENST00000334218
CDC42BPA	1:227259959	c.297C>G	L99	ENST00000441725
CDC42BPA	1:227348328	c.609A>G	K203	ENST00000334218
CDC42BPA	1:227333349	c.984A>C	R328	ENST00000334218
CDC42BPA	1:227216756	c.1602G>T	V534	ENST00000441725
CDC42BPA	1:227221038	c.3450T>C	F1150	ENST00000334218
CDC42BPA	1:227211022	c.4452A>G	S1484	ENST00000334218
CDC42BPA	1:227213828	c.4458G>A	V1486	ENST00000366766
CDC42BPA	1:227182038	c.5196C>T	S1732	ENST00000366766
CDC42BPA	1:227182611	c.5046G>A	Q1682	ENST00000366766
CDC42BPA	1:227300540	c.1722G>A	L574	ENST00000334218
CDC42BPA	1:227192753	c.4998C>T	I1666	ENST00000334218
CDC42BPA	1:227259997	c.2739A>G	K913	ENST00000334218
CDC42BPA	1:227227863	c.3063G>C	V1021	ENST00000334218
CDC42BPA	1:227316871	c.1452C>T	S484	ENST00000334218
CDC42BPA	1:227259910	c.2826G>A	K942	ENST00000334218
CHEK2	22:29121017	c.540C>A	R180	ENST00000328354
CHST13	3:126261259	c.864C>T	F288	ENST00000319340
DFNB31	9:117228550	c.960C>G	L320	ENST00000362057
DFNB31	9:117266599	c.483G>A	E161	ENST00000362057
DFNB31	9:117169017	c.1854C>A	G618	ENST00000362057
DFNB31	9:117186785	c.1245G>C	L415	ENST00000362057
DFNB31	9:117165592	c.2446C>T	L816	ENST00000362057
DFNB31	9:117186686	c.1344G>A	E448	ENST00000362057
DFNB31	9:117168927	c.1944C>T	S648	ENST00000362057
DFNB31	9:117185660	c.1560C>T	V520	ENST00000362057
DFNB31	9:117168831	c.2040C>T	F680	ENST00000362057
DFNB31	9:117266506	c.576C>T	N192	ENST00000362057
DFNB31	9:117266881	c.201G>A	A67	ENST00000362057
DFNB31	9:117240980	c.690C>T	T230	ENST00000362057
DFNB31	9:117266884	c.198C>T	H66	ENST00000362057
DFNB31	9:117266581	c.501C>T	Y167	ENST00000362057
DFNB31	9:117166263	c.2331C>A	G777	ENST00000362057
DNM1	9:130982346	c.669G>A	K223	ENST00000372923
DNM1	9:131004549	c.1596C>T	G532	ENST00000372923
DNM1	9:130986608	c.1275C>A	L425	ENST00000372923
DNM1	9:130985086	c.1143G>A	E381	ENST00000372923
DNM1	9:130984529	c.903G>A	Q301	ENST00000372923
DTNA	18:32418088	c.1128G>A	Q376	ENST00000269190
FYB	5:39130699	c.1833A>G	G611	ENST00000505428
FYB	5:39119036	c.2341C>T	L781	ENST00000505428
FYB	5:39202124	c.939C>T	F313	ENST00000505428
GCOM1	15:57910260	c.192C>T	T64	ENST00000380569
GCOM1	15:57931689	c.1065C>T	H355	ENST00000380569
GCOM1	15:57931719	c.1095G>A	K365	ENST00000380569
GSTM5	1:110257763	c.468G>A	V156	ENST00000256593
GSTM5	1:110257640	c.432G>A	K144	ENST00000256593
GSTM5	1:110257571	c.420G>A	E140	ENST00000369812
GSTM5	1:110255296	c.93G>A	K31	ENST00000369812
HCRTR1	1:32087137	c.682C>T	L228	ENST00000373706
HCRTR1	1:32089222	c.837G>A	R279	ENST00000373706
HCRTR1	1:32086542	c.477G>A	R159	ENST00000373706
HCRTR1	1:32086455	c.390G>A	V130	ENST00000373706
HMGB3	X:150156381	c.597T>C	D199	ENST00000325307
HMGB3	X:150155604	c.294T>C	S98	ENST00000325307
HMGB3	X:150156315	c.531G>A	R177	ENST00000325307
HMGB3	X:150155679	c.369G>C	V123	ENST00000325307
HSPA8	11:122930482	c.819C>T	T273	ENST00000532636
HSPA8	11:122930632	c.669T>C	A223	ENST00000532636
HSPA8	11:122931493	c.219G>A	L73	ENST00000532636
HSPA8	11:122928472	c.1911C>A	S637	ENST00000532636
HSPA8	11:122930653	c.648C>A	I216	ENST00000532636
HSPA8	11:122930668	c.633T>C	T211	ENST00000532636
HSPA8	11:122931841	c.192C>T	T64	ENST00000532636
HSPA8	11:122930929	c.459T>C	S153	ENST00000532636
HSPA8	11:122931847	c.186C>T	N62	ENST00000532636
HSPA8	11:122929458	c.1404C>T	P468	ENST00000532636
HSPA8	11:122929032	c.1683G>A	K561	ENST00000532636
ILF3	19:10781688	c.42G>C	V14	ENST00000318511
ILF3	19:10794068	c.1701A>G	Q567	ENST00000318511
ILF3	19:10799332	c.2529C>A	G843	ENST00000318511
ILF3	19:10799955	c.2652C>T	N884	ENST00000318511
ILF3	19:10792704	c.1216C>T	L406	ENST00000318511
ILF3	19:10789296	c.567A>G	L189	ENST00000318511
ILF3	19:10792757	c.1269G>A	Q423	ENST00000318511
ILF3	19:10794134	c.1767C>T	F589	ENST00000318511
ILF3	19:10791923	c.1098C>T	A366	ENST00000318511
ILF3	19:10782043	c.243G>A	K81	ENST00000318511
KCNMA1	10:78674713	c.3009C>T	I1003	ENST00000406533
KCNMA1	10:78708960	c.2661T>C	I887	ENST00000406533
KCNMA1	10:78709029	c.2592G>T	L864	ENST00000406533
KCNMA1	10:78647231	c.3513G>A	P1171	ENST00000354353
KCNMA1	10:78832919	c.162G>A	Q54	ENST00000450795
KCNMA1	10:79397041	c.360C>T	H120	ENST00000406533
KCNMA1	10:78761238	c.2205C>T	N735	ENST00000406533
KCNMA1	10:78669796	c.3087A>G	E1029	ENST00000406533
KCNMA1	10:79010979	c.576T>C	L192	ENST00000406533
KCNMA1	10:78880778	c.837G>A	L279	ENST00000406533
KCNMA1	10:78709080	c.2541G>A	V847	ENST00000406533
KCNMA1	10:78943231	c.756C>T	F252	ENST00000406533
KCNMA1	10:78669808	c.3075C>T	D1025	ENST00000406533
KCNMA1	10:78850220	c.1272C>T	F424	ENST00000406533
KCNMA1	10:78647063	c.3684C>A	S1228	ENST00000406533
KCNMA1	10:78647111	c.3636C>T	S1212	ENST00000406533
KCNMA1	10:78647165	c.3582C>T	S1194	ENST00000406533
KCNMA1	10:78944602	c.675C>T	F225	ENST00000406533
KCNMA1	10:78799339	c.1806C>T	Y602	ENST00000406533
KCNMA1	10:78771771	c.2058T>C	D686	ENST00000406533
KCNMA1	10:78651358	c.3279G>A	P1093	ENST00000406533
KCNMA1	10:78708987	c.2634C>G	L878	ENST00000406533
KCNMA1	10:78649235	c.3447C>T	L1149	ENST00000406533
KIAA2018	3:113377643	c.2886A>G	S962	ENST00000316407
KIAA2018	3:113379494	c.1035G>A	S345	ENST00000316407
KIAA2018	3:113378168	c.2361G>A	L787	ENST00000316407
KIAA2018	3:113374508	c.6021T>C	F2007	ENST00000316407
KIAA2018	3:113374871	c.5658T>A	I1886	ENST00000316407
KIAA2018	3:113376125	c.4404G>A	Q1468	ENST00000316407
KIAA2018	3:113379962	c.567T>C	T189	ENST00000316407
KIAA2018	3:113378525	c.2004A>G	G668	ENST00000316407
KIAA2018	3:113376113	c.4416G>A	Q1472	ENST00000316407
KIAA2018	3:113373818	c.6711A>G	L2237	ENST00000316407
KIAA2018	3:113377826	c.2703T>C	H901	ENST00000316407
KIAA2018	3:113375879	c.4650C>T	S1550	ENST00000316407
KIAA2018	3:113375207	c.5322T>G	A1774	ENST00000316407
KIF21B	1:200973933	c.861C>T	G287	ENST00000422435
KIF21B	1:200959737	c.2802C>G	V934	ENST00000422435
KIF21B	1:200960092	c.2640C>T	F880	ENST00000422435
KIF21B	1:200959275	c.3021G>A	E1007	ENST00000422435
KIF21B	1:200974481	c.687C>T	F229	ENST00000422435
KIF21B	1:200977902	c.442C>T	L148	ENST00000422435
KIF21B	1:200946393	c.4272C>T	G1424	ENST00000422435
KIF21B	1:200978517	c.141C>A	A47	ENST00000422435
KIF21B	1:200956183	c.3555C>T	D1185	ENST00000422435
KIF21B	1:200944036	c.4620C>T	I1540	ENST00000422435
KIF21B	1:200959404	c.2892G>A	L964	ENST00000422435
KIF21B	1:200943295	c.4842C>T	Y1614	ENST00000422435
KIF21B	1:200960791	c.2448C>A	T816	ENST00000422435
KIF21B	1:200973948	c.846G>T	R282	ENST00000422435
KIF21B	1:200956153	c.3585C>T	T1195	ENST00000422435
KIF21B	1:200956321	c.3417C>T	P1139	ENST00000422435
KIF21B	1:200959302	c.2994C>T	D998	ENST00000422435
KIF21B	1:200959272	c.3024G>A	E1008	ENST00000422435
KIF21B	1:200945972	c.4375C>T	L1459	ENST00000422435
KIF21B	1:200946489	c.4176G>A	V1392	ENST00000422435
KIF21B	1:200978068	c.276G>A	G92	ENST00000422435
KIF21B	1:200956195	c.3543C>T	F1181	ENST00000422435
KIF21B	1:200960848	c.2391G>A	Q797	ENST00000422435
KIF21B	1:200960266	c.2466G>T	L822	ENST00000422435
KIF21B	1:200965501	c.2100G>A	E700	ENST00000422435
KIF21B	1:200965480	c.2121G>A	K707	ENST00000422435
KIF21B	1:200959121	c.3081G>A	L1027	ENST00000422435
KIF21B	1:200967693	c.1896C>T	F632	ENST00000422435
KIF21B	1:200978520	c.138G>A	K46	ENST00000422435
KIF21B	1:200969865	c.1446C>T	I482	ENST00000422435
KIF21B	1:200969712	c.1491C>T	A497	ENST00000422435
KIF21B	1:200978460	c.198C>T	T66	ENST00000422435
KIF21B	1:200943844	c.4812C>A	S1604	ENST00000422435
KIF21B	1:200965372	c.2229G>A	R743	ENST00000422435
KIF21B	1:200967555	c.2034C>T	I678	ENST00000422435
KIF21B	1:200950134	c.3933C>T	I1311	ENST00000422435
KIF21B	1:200974808	c.462G>A	E154	ENST00000422435
KIF21B	1:200974805	c.465C>A	I155	ENST00000422435
KMT2C	7:151904386	c.3840A>G	P1280	ENST00000262189
KMT2C	7:151877802	c.7143G>A	L2381	ENST00000262189
KMT2C	7:151960173	c.1227T>C	C409	ENST00000262189
KMT2C	7:151892993	c.4377A>G	S1459	ENST00000262189
KMT2C	7:151944990	c.2529A>G	K843	ENST00000262189
KMT2C	7:151860030	c.10632C>T	F3544	ENST00000262189
KMT2C	7:151851221	c.12150A>G	S4050	ENST00000262189
KMT2C	7:151927074	c.2910A>G	A970	ENST00000262189
KMT2C	7:151921174	c.3249C>T	S1083	ENST00000262189
KMT2C	7:151970836	c.966C>T	H322	ENST00000262189
KMT2C	7:151884823	c.4770A>G	A1590	ENST00000262189
KMT2C	7:151932953	c.2718C>T	G906	ENST00000262189
KMT2C	7:151873592	c.8946T>G	V2982	ENST00000262189
KMT2C	7:151879119	c.5826A>G	T1942	ENST00000262189
KMT2C	7:151970857	c.945C>T	G315	ENST00000262189
KMT2C	7:151962224	c.1083T>A	T361	ENST00000262189
KMT2C	7:151851428	c.12063G>T	L4021	ENST00000262189
KMT2C	7:151851206	c.12165C>T	I4055	ENST00000262189
KMT2C	7:151851443	c.12048C>T	S4016	ENST00000262189
KMT2C	7:151970809	c.993T>A	I331	ENST00000262189
KMT2C	7:151873396	c.9142C>T	L3048	ENST00000262189
KMT2C	7:151873700	c.8838C>T	S2946	ENST00000262189
KMT2C	7:151921636	c.3042G>A	G1014	ENST00000262189
KMT2C	7:151970842	c.960C>T	F320	ENST00000262189
KMT2C	7:151970830	c.972C>T	F324	ENST00000262189
KMT2C	7:151851430	c.12061C>T	L4021	ENST00000262189
KMT2C	7:151970806	c.996C>T	D332	ENST00000262189
KMT2C	7:151970848	c.954G>A	Q318	ENST00000262189
KMT2C	7:151962239	c.1068G>A	Q356	ENST00000262189
KMT2C	7:151945143	c.2376T>C	P792	ENST00000262189
KMT2C	7:151845551	c.13461C>T	C4487	ENST00000262189
KMT2C	7:151962206	c.1101T>C	H367	ENST00000262189
KMT2C	7:151871239	c.9351C>T	G3117	ENST00000262189
KMT2C	7:151845263	c.13749C>T	S4583	ENST00000262189
KMT2C	7:151878420	c.6525T>C	S2175	ENST00000262189
KMT2C	7:151845212	c.13800C>T	C4600	ENST00000262189
KMT2C	7:151962143	c.1164C>T	C388	ENST00000262189
KMT2C	7:151893050	c.4320A>G	T1440	ENST00000262189
KMT2C	7:151891595	c.4437T>C	S1479	ENST00000262189
KMT2C	7:151874750	c.7788G>A	R2596	ENST00000262189
KMT2C	7:151860303	c.10359C>T	F3453	ENST00000262189
KPNA2	17:66040481	c.1209C>T	N403	ENST00000330459
KPNA2	17:66033314	c.66A>G	K22	ENST00000330459
KPNA2	17:66040613	c.1341C>T	I447	ENST00000330459
KRTAP4-11	17:39274427	c.141C>T	S47	ENST00000391413
LAMA5	20:60900480	c.5421C>T	F1807	ENST00000252999
LAMA5	20:60908523	c.3036G>A	L1012	ENST00000252999
LAMA5	20:60893579	c.7170G>T	R2390	ENST00000252999
LAMA5	20:60897344	c.6327C>T	L2109	ENST00000252999
LAMA5	20:60904839	c.4113C>T	L1371	ENST00000252999
LAMA5	20:60892007	c.7584C>T	I2528	ENST00000252999
LAMA5	20:60909380	c.2601C>T	Y867	ENST00000252999
LAMA5	20:60888162	c.8937C>T	L2979	ENST00000252999
LAMA5	20:60893546	c.7203C>T	L2401	ENST00000252999
LAMA5	20:60901999	c.5136C>T	L1712	ENST00000252999
LAMA5	20:60900498	c.5403G>A	Q1801	ENST00000252999
LAMA5	20:60901736	c.5295G>A	V1765	ENST00000252999
LAMA5	20:60926762	c.954C>T	F318	ENST00000252999
LAMA5	20:60904229	c.4200C>T	F1400	ENST00000252999
LAMA5	20:60908263	c.3165C>T	F1055	ENST00000252999
LAMA5	20:60908707	c.2934C>T	I978	ENST00000252999
LAMA5	20:60904090	c.4257C>T	F1419	ENST00000252999
LAMA5	20:60911481	c.2238C>T	C746	ENST00000252999
LAMA5	20:60904247	c.4182G>A	L1394	ENST00000252999
LAMA5	20:60908290	c.3138C>T	L1046	ENST00000252999
LBX1	10:102988468	c.105G>A	P35	ENST00000370193
LBX1	10:102987204	c.669C>T	G223	ENST00000370193
LBX1	10:102987399	c.474C>T	I158	ENST00000370193
LBX1	10:102988411	c.162C>T	C54	ENST00000370193
LBX1	10:102987414	c.459C>T	A153	ENST00000370193
LBX1	10:102987051	c.822C>T	D274	ENST00000370193
LBX1	10:102987042	c.831C>T	I277	ENST00000370193
LBX1	10:102988546	c.27G>T	A9	ENST00000370193
LBX1	10:102987321	c.552G>T	L184	ENST00000370193
LCP2	5:169693822	c.762C>A	P254	ENST00000046794
MCMDC2	8:67796113	c.957C>T	Y319	ENST00000422365
MGAM	7:141763364	c.4323G>A	L1441	ENST00000475668
MGAM	7:141765159	c.4509G>A	Q1503	ENST00000475668
MGAM	7:141786092	c.6714C>T	I2238	ENST00000475668
MGAM	7:141773951	c.5256C>T	F1752	ENST00000475668
MGAM	7:141781920	c.6084C>A	L2028	ENST00000475668
MGAM	7:141734096	c.1704C>A	L568	ENST00000475668
MGAM	7:141755835	c.3519C>T	Y1173	ENST00000475668
MGAM	7:141763307	c.4266T>C	N1422	ENST00000475668
MGAM	7:141764245	c.4407C>T	I1469	ENST00000475668
MGAM	7:141740608	c.2460C>T	I820	ENST00000475668
MGAM	7:141755436	c.3393C>T	L1131	ENST00000475668
MGAM	7:141758051	c.3742C>T	L1248	ENST00000475668
MGAM	7:141722209	c.852C>T	P284	ENST00000475668
MGAM	7:141730287	c.1347C>T	I449	ENST00000475668
MGAM	7:141755883	c.3567C>T	N1189	ENST00000475668
MGAM	7:141734488	c.1806C>T	F602	ENST00000475668
MGAM	7:141736730	c.2184C>T	F728	ENST00000475668
MGAM	7:141762403	c.4158C>T	F1386	ENST00000475668
MGAM	7:141794439	c.7329C>T	L2443	ENST00000475668
MGAM	7:141797449	c.7752G>C	T2584	ENST00000475668
MGAM	7:141722068	c.711G>A	L237	ENST00000475668
MGAM	7:141734623	c.1941C>T	N647	ENST00000475668
MGAM	7:141796173	c.7653C>T	F2551	ENST00000475668
MGAM	7:141797431	c.7734C>T	R2578	ENST00000475668
MLLT3	9:20414280	c.564C>T	S188	ENST00000380338
MLLT3	9:20363527	c.1278C>T	D426	ENST00000380338
MLLT3	9:20346483	c.1665C>T	V555	ENST00000380338
MLLT3	9:20414370	c.474C>T	S158	ENST00000380338
MLLT3	9:20620762	c.84C>T	F28	ENST00000380338
MXRA5	X:3235604	c.6118C>T	L2040	ENST00000381114
MXRA5	X:3227826	c.8418C>A	G2806	ENST00000381114
MXRA5	X:3229200	c.7044C>T	I2348	ENST00000381114
MXRA5	X:3228297	c.7947C>T	I2649	ENST00000381114
MXRA5	X:3229527	c.6717G>A	V2239	ENST00000381114
MXRA5	X:3229530	c.6714G>A	V2238	ENST00000381114
MYB	6:135518458	c.1563G>A	S521	ENST00000341911
MYB	6:135518269	c.1374G>A	E458	ENST00000341911
MYB	6:135539101	c.2269C>A	R757	ENST00000341911
MYB	6:135518428	c.1533C>T	S511	ENST00000341911
MYB	6:135539112	c.2280C>A	V760	ENST00000341911
MYB	6:135517008	c.1071G>A	L357	ENST00000341911
NAB2	12:57485124	c.300G>A	Q100	ENST00000300131
NAB2	12:57485235	c.411G>C	R137	ENST00000300131
NAB2	12:57485769	c.945C>T	L315	ENST00000300131
NKX3-2	4:13543811	c.808C>T	L270	ENST00000382438
NKX3-2	4:13543767	c.852G>A	V284	ENST00000382438
NKX3-2	4:13543785	c.834G>A	K278	ENST00000382438
NLRP7	19:55450843	c.1428C>T	F476	ENST00000446217
NME3	16:1820659	c.501G>A	L167	ENST00000219302
NRSN1	6:24145982	c.396G>A	G132	ENST00000378491
NRSN1	6:24145907	c.321G>A	Q107	ENST00000378491
NRSN1	6:24145991	c.405G>A	L135	ENST00000378491
NRSN1	6:24134690	c.135G>A	E45	ENST00000378491
NRSN1	6:24134672	c.117C>T	A39	ENST00000378491
NRXN1	2:50758375	c.2457G>A	T819	ENST00000404971
NRXN1	2:50733715	c.2535T>C	N845	ENST00000404971
NRXN1	2:50765581	c.2073C>T	G691	ENST00000404971
NRXN1	2:51255079	c.333C>T	D111	ENST00000404971
NRXN1	2:50765725	c.1929G>A	E643	ENST00000404971
NRXN1	2:51149818	c.897G>A	A299	ENST00000404971
NRXN1	2:50573974	c.114G>A	P38	ENST00000342183
NRXN1	2:50149274	c.4452C>T	C1484	ENST00000404971
NRXN1	2:50765740	c.1914C>T	Y638	ENST00000404971
NRXN1	2:50282157	c.3864G>A	A1288	ENST00000404971
NRXN1	2:50779939	c.1521C>T	G507	ENST00000402717
NRXN1	2:50765467	c.2187C>A	G729	ENST00000404971
NRXN1	2:50149352	c.4374A>T	P1458	ENST00000404971
NRXN1	2:50779891	c.1713G>A	K571	ENST00000404971
NRXN1	2:50780062	c.1542G>A	E514	ENST00000404971
NRXN1	2:50847271	c.1209A>G	E403	ENST00000406316
NRXN1	2:50149333	c.4393C>A	R1465	ENST00000404971
NRXN1	2:50280652	c.3795C>A	G1265	ENST00000406316
NRXN1	2:51255400	c.12G>A	A4	ENST00000406316
NRXN1	2:50765691	c.1843C>T	L615	ENST00000406316
NRXN1	2:51255076	c.336C>T	G112	ENST00000404971
NRXN1	2:50850704	c.882C>T	Y294	ENST00000406316
NRXN1	2:50149142	c.4584C>A	P1528	ENST00000404971
NRXN1	2:51254752	c.660C>T	G220	ENST00000404971
NRXN1	2:51255367	c.45C>T	C15	ENST00000406316
NRXN1	2:50149094	c.4422G>A	E1474	ENST00000406316
NRXN1	2:50755764	c.2493C>A	S831	ENST00000404971
NRXN1	2:51255172	c.240G>A	E80	ENST00000406316
NRXN1	2:51254788	c.624G>A	P208	ENST00000404971
NRXN1	2:50280583	c.4074C>T	I1358	ENST00000404971
NRXN1	2:50463974	c.3619C>A	R1207	ENST00000404971
NRXN1	2:50464017	c.3576G>T	L1192	ENST00000404971
NRXN1	2:50280565	c.4092G>C	V1364	ENST00000404971
NRXN1	2:50723176	c.3057A>G	S1019	ENST00000404971
NRXN1	2:50847250	c.1350T>A	S450	ENST00000404971
NRXN1	2:50723113	c.3120C>A	L1040	ENST00000404971
NRXN1	2:50149181	c.4545A>G	S1515	ENST00000404971
NRXN1	2:50724617	c.2853C>T	T951	ENST00000404971
NRXN1	2:50765611	c.2043G>T	V681	ENST00000404971
NRXN1	2:50850722	c.864A>T	G288	ENST00000406316
NRXN1	2:50850692	c.993A>G	Q331	ENST00000404971
NRXN1	2:51255226	c.186C>T	S62	ENST00000404971
NRXN1	2:50724557	c.2913C>T	F971	ENST00000404971
NRXN1	2:51255169	c.243G>A	L81	ENST00000404971
NRXN1	2:51255022	c.390C>T	I130	ENST00000404971
NRXN1	2:50758449	c.2383C>T	L795	ENST00000404971
NRXN1	2:50733643	c.2607G>A	Q869	ENST00000404971
NRXN1	2:50779744	c.1860C>T	F620	ENST00000404971
NRXN1	2:51255178	c.234C>T	F78	ENST00000404971
NRXN1	2:50758401	c.2431C>T	L811	ENST00000404971
NRXN1	2:50779774	c.1830G>A	V610	ENST00000404971
NRXN1	2:50724509	c.2961G>A	G987	ENST00000404971
NRXN1	2:50724620	c.2850G>A	K950	ENST00000404971
NRXN1	2:50765707	c.1947G>A	L649	ENST00000404971
NRXN1	2:50779924	c.1680C>T	S560	ENST00000404971
NRXN1	2:50850746	c.939A>G	E313	ENST00000404971
NRXN1	2:50464107	c.261T>C	A87	ENST00000342183
NRXN1	2:50280724	c.3933T>C	R1311	ENST00000404971
NRXN1	2:51255184	c.228C>T	C76	ENST00000404971
NRXN1	2:50464092	c.3501C>A	I1167	ENST00000404971
NRXN1	2:50850557	c.1128C>A	V376	ENST00000404971
NRXN1	2:50733718	c.2532C>G	L844	ENST00000404971
NRXN1	2:51255151	c.261C>T	G87	ENST00000404971
NRXN1	2:50149136	c.4590T>C	S1530	ENST00000404971
NRXN1	2:51254743	c.669C>T	G223	ENST00000404971
NRXN1	2:50850596	c.1089T>C	Y363	ENST00000404971
NRXN1	2:51254845	c.567C>T	V189	ENST00000404971
NRXN2	11:64375247	c.4560C>A	V1520	ENST00000377551
NRXN2	11:64419008	c.2637C>T	I879	ENST00000377551
NRXN2	11:64436059	c.1215C>T	D405	ENST00000377551
NRXN2	11:64457917	c.810C>T	A270	ENST00000377551
NRXN2	11:64419520	c.2523C>T	N841	ENST00000377551
NRXN2	11:64436053	c.1221C>T	I407	ENST00000377551
NRXN2	11:64453121	c.1149C>A	R383	ENST00000377551
NRXN2	11:64402790	c.3538C>A	R1180	ENST00000377551
NRXN2	11:64374839	c.4968C>T	A1656	ENST00000377551
NRXN2	11:64390411	c.3987C>A	P1329	ENST00000377551
NRXN2	11:64418975	c.2670G>A	Q890	ENST00000377551
NRXN2	11:64453370	c.900C>T	Y300	ENST00000377551
NRXN2	11:64416297	c.3192C>A	G1064	ENST00000377551
NRXN2	11:64416264	c.3225C>T	L1075	ENST00000377551
NRXN2	11:64375232	c.4575C>T	T1525	ENST00000377551
NRXN2	11:64435984	c.1290G>A	G430	ENST00000377551
NRXN2	11:64453331	c.939G>A	E313	ENST00000377551
NRXN2	11:64427964	c.2229C>T	I743	ENST00000377551
NRXN2	11:64419053	c.2592C>T	I864	ENST00000377551
NRXN2	11:64390348	c.4050G>A	A1350	ENST00000377551
NRXN2	11:64453288	c.982C>T	L328	ENST00000377551
NRXN2	11:64390363	c.4035C>T	S1345	ENST00000377551
NRXN2	11:64417930	c.3099C>T	L1033	ENST00000377551
NRXN2	11:64374929	c.4878G>A	V1626	ENST00000377551
NRXN2	11:64390423	c.3975C>T	A1325	ENST00000377551
NRXN2	11:64480980	c.192G>T	A64	ENST00000377551
NRXN2	11:64457929	c.798C>T	S266	ENST00000377551
OGG1	3:9793509	c.441C>A	S147	ENST00000302036
OPRM1	6:154412361	c.918C>A	A306	ENST00000229768
OPRM1	6:154411138	c.468C>T	S156	ENST00000229768
OPRM1	6:154411105	c.714G>A	V238	ENST00000434900
OPRM1	6:154412478	c.1314C>T	F438	ENST00000434900
OPRM1	6:154412559	c.1395T>G	T465	ENST00000434900
OPRM1	6:154412526	c.1362G>A	E454	ENST00000434900
PARD3B	2:206305230	c.2692C>A	R898	ENST00000358768
PARD3B	2:206364737	c.2976T>C	S992	ENST00000358768
PARD3B	2:205983735	c.771C>T	I257	ENST00000358768
PARD3B	2:205990453	c.1426C>A	R476	ENST00000358768
PARD3B	2:206305094	c.2556G>A	R852	ENST00000358768
PARD3B	2:206166390	c.2409G>A	R803	ENST00000358768
PARD3B	2:205986630	c.1122C>A	G374	ENST00000358768
PARD3B	2:206166207	c.2226C>T	S742	ENST00000358768
PCDH11X	X:91134233	c.2994G>T	V998	ENST00000373094
PCDH11X	X:91090821	c.318C>T	C106	ENST00000373094
PCDH11X	X:91132565	c.1326C>T	G442	ENST00000504220
PCDH11X	X:91132082	c.843T>C	N281	ENST00000504220
PCDH11X	X:91133909	c.2670A>G	E890	ENST00000373094
PCDH11X	X:91133858	c.2619G>A	K873	ENST00000373094
PCDH11X	X:91134161	c.2922C>A	A974	ENST00000373094
PCDH11X	X:91873264	c.3369T>A	A1123	ENST00000373094
PCDH11X	X:91133246	c.2007C>T	N669	ENST00000373094
PCDH11X	X:91134266	c.3027C>G	T1009	ENST00000373094
PCDH11X	X:91134254	c.3015G>T	V1005	ENST00000373094
PCDH11X	X:91133813	c.2574C>T	N858	ENST00000373094
PCDH11X	X:91134173	c.2934C>T	I978	ENST00000373094
PCDH11X	X:91090671	c.168C>T	S56	ENST00000373094
PCDH11X	X:91133285	c.2046T>C	Y682	ENST00000373094
PCDH11X	X:91134257	c.3018C>G	S1006	ENST00000373094
PCLO	7:82579161	c.10743G>A	L3581	ENST00000333891
PCLO	7:82595087	c.4017A>G	T1339	ENST00000333891
PCLO	7:82581179	c.9090T>C	V3030	ENST00000333891
PCLO	7:82764109	c.2757G>A	Q919	ENST00000333891
PCLO	7:82583837	c.6432A>G	E2144	ENST00000333891
PCLO	7:82785531	c.426T>C	T142	ENST00000333891
PCLO	7:82476475	c.13743A>G	E4581	ENST00000333891
PCLO	7:82508666	c.13641G>A	G4547	ENST00000333891
PCLO	7:82583642	c.6627T>G	V2209	ENST00000333891
PCLO	7:82453556	c.14592A>G	S4864	ENST00000333891
PCLO	7:82584596	c.5673A>C	S1891	ENST00000333891
PCLO	7:82544315	c.12987T>C	S4329	ENST00000333891
PCLO	7:82532016	c.13479T>C	P4493	ENST00000333891
PCLO	7:82581302	c.8967A>G	G2989	ENST00000333891
PCLO	7:82451893	c.14709C>T	S4903	ENST00000333891
PCLO	7:82585490	c.4779G>A	K1593	ENST00000333891
PCLO	7:82582694	c.7575A>G	K2525	ENST00000333891
PCLO	7:82582364	c.7905A>C	S2635	ENST00000333891
PCLO	7:82595777	c.3327C>T	C1109	ENST00000333891
PCLO	7:82584623	c.5646A>G	K1882	ENST00000333891
PCLO	7:82544369	c.12933C>T	S4311	ENST00000333891
PCLO	7:82544336	c.12966A>G	E4322	ENST00000333891
PCLO	7:82584605	c.5664A>G	T1888	ENST00000333891
PCLO	7:82545650	c.11652T>A	P3884	ENST00000333891
PCLO	7:82580709	c.9195A>T	T3065	ENST00000333891
PCLO	7:82579038	c.10866C>T	V3622	ENST00000333891
PCLO	7:82579134	c.10770G>A	K3590	ENST00000333891
PCLO	7:82538238	c.13392G>C	P4464	ENST00000333891
PCLO	7:82453631	c.14517C>T	S4839	ENST00000423517
PCLO	7:82583933	c.6336A>T	S2112	ENST00000333891
PCLO	7:82544135	c.13167G>A	R4389	ENST00000333891
PCLO	7:82545752	c.11550G>A	Q3850	ENST00000333891
PCLO	7:82538321	c.13309C>T	L4437	ENST00000333891
PCLO	7:82581191	c.9078T>C	T3026	ENST00000333891
PCLO	7:82580214	c.9690C>T	R3230	ENST00000333891
PCLO	7:82579668	c.10236G>A	K3412	ENST00000333891
PCLO	7:82580151	c.9753C>T	I3251	ENST00000333891
PCLO	7:82585181	c.5088G>A	E1696	ENST00000333891
PCLO	7:82390045	c.15198G>A	K5066	ENST00000333891
PCLO	7:82580232	c.9672G>A	E3224	ENST00000333891
PCLO	7:82453568	c.14580C>T	F4860	ENST00000333891
PCLO	7:82475947	c.13767C>T	D4589	ENST00000333891
PCLO	7:82764424	c.2442C>T	S814	ENST00000333891
PCLO	7:82579263	c.10641A>G	V3547	ENST00000333891
PCLO	7:82532040	c.13455G>A	G4485	ENST00000333891
PCLO	7:82544027	c.13275C>T	F4425	ENST00000333891
PCLO	7:82764151	c.2715C>T	F905	ENST00000333891
PCLO	7:82546172	c.11130C>T	T3710	ENST00000333891
PCLO	7:82579080	c.10824C>T	S3608	ENST00000333891
PCLO	7:82582544	c.7725C>T	S2575	ENST00000333891
PCLO	7:82585844	c.4425G>A	R1475	ENST00000333891
PCLO	7:82784258	c.1699C>T	L567	ENST00000333891
PCLO	7:82545449	c.11853G>A	Q3951	ENST00000333891
PCLO	7:82388008	c.15312G>A	G5104	ENST00000333891
PCLO	7:82579734	c.10170C>T	I3390	ENST00000333891
PCLO	7:82544719	c.12583C>T	L4195	ENST00000333891
PCLO	7:82580169	c.9735C>T	F3245	ENST00000333891
PCLO	7:82785402	c.555C>T	S185	ENST00000333891
PCLO	7:82580577	c.9327C>T	S3109	ENST00000333891
PCLO	7:82455959	c.14361G>A	L4787	ENST00000333891
PCLO	7:82585753	c.4516A>C	R1506	ENST00000333891
PCLO	7:82545019	c.12283C>T	L4095	ENST00000333891
PCLO	7:82578909	c.10995C>T	P3665	ENST00000333891
PCLO	7:82578963	c.10941C>T	L3647	ENST00000333891
PCLO	7:82430892	c.14949G>A	Q4983	ENST00000333891
PCLO	7:82585211	c.5058G>A	Q1686	ENST00000333891
PCLO	7:82545710	c.11592C>T	F3864	ENST00000333891
PCLO	7:82580130	c.9774G>A	E3258	ENST00000333891
PCLO	7:82544741	c.12561G>A	K4187	ENST00000333891
PCLO	7:82763950	c.2916G>A	Q972	ENST00000333891
PCLO	7:82583831	c.6438A>G	V2146	ENST00000333891
PCLO	7:82578855	c.11049G>A	K3683	ENST00000333891
PCLO	7:82387933	c.15387C>T	V5129	ENST00000333891
PCLO	7:82545733	c.11569A>C	R3857	ENST00000333891
PCLO	7:82474764	c.13869G>A	Q4623	ENST00000333891
PCLO	7:82390090	c.15153G>C	V5051	ENST00000333891
PCSK5	9:78601083	c.333G>A	R111	ENST00000545128
PCSK5	9:78749091	c.1275C>T	N425	ENST00000545128
PCSK5	9:78953338	c.4860C>T	C1620	ENST00000545128
PCSK5	9:78804077	c.2448G>A	Q816	ENST00000545128
PCSK5	9:78686785	c.865C>A	R289	ENST00000545128
PCSK5	9:78641900	c.579G>A	V193	ENST00000545128
PCSK5	9:78547381	c.279C>T	F93	ENST00000545128
PCSK5	9:78796447	c.2137C>T	L713	ENST00000545128
PCSK5	9:78794543	c.1932C>T	G644	ENST00000545128
PCSK5	9:78973755	c.5500C>A	R1834	ENST00000545128
PCSK5	9:78547339	c.237G>A	T79	ENST00000545128
PCSK5	9:78969113	c.5151C>T	C1717	ENST00000545128
PTGER3	1:71513072	c.189C>T	F63	ENST00000354608
PTGER3	1:71512571	c.690C>T	F230	ENST00000354608
PTGER3	1:71513050	c.211C>T	L71	ENST00000354608
PTGER3	1:71512676	c.585C>T	G195	ENST00000354608
PTGER3	1:71478123	c.942C>T	H314	ENST00000354608
PTK7	6:43099859	c.918G>A	Q306	ENST00000230419
PTK7	6:43109925	c.1935G>A	Q645	ENST00000230419
PTK7	6:43099886	c.945C>T	A315	ENST00000230419
PTK7	6:43126671	c.2838G>A	V946	ENST00000230419
PTK7	6:43112987	c.2457G>A	E819	ENST00000230419
PTK7	6:43128550	c.3144C>T	P1048	ENST00000230419
PTK7	6:43107157	c.1512C>T	F504	ENST00000230419
PTK7	6:43098319	c.732C>T	F244	ENST00000230419
PTK7	6:43098289	c.702G>A	V234	ENST00000230419
PTK7	6:43114421	c.2706C>T	L902	ENST00000230419
PWWP2B	10:134219036	c.1032G>A	E344	ENST00000305233
RERGL	12:18234224	c.519G>A	L173	ENST00000229002
RERGL	12:18237579	c.207C>T	S69	ENST00000229002
RGPD4	2:108478127	c.2136G>C	L712	ENST00000354986
RGPD4	2:108443505	c.36C>T	V12	ENST00000408999
RGPD4	2:108488609	c.4149G>A	K1383	ENST00000354986
RGS7	1:240969482	c.1227G>A	Q409	ENST00000407727
RGS7	1:241031965	c.531G>T	V177	ENST00000407727
RGS7	1:240966240	c.1323C>A	S441	ENST00000407727
RGS7	1:241099906	c.327G>C	R109	ENST00000407727
RGS7	1:240939492	c.1435A>C	R479	ENST00000366565
RGS7	1:240976974	c.900T>C	P300	ENST00000407727
RGS7	1:240966246	c.1317A>T	I439	ENST00000407727
RGS7	1:241099992	c.241T>C	L81	ENST00000407727
RGS7	1:241031932	c.564C>T	I188	ENST00000407727
RGS7	1:241099908	c.325C>A	R109	ENST00000407727
RGS7	1:240969602	c.1107G>A	L369	ENST00000407727
RGS7	1:240990446	c.636G>T	V212	ENST00000407727
RGS7	1:240966228	c.1335G>A	Q445	ENST00000407727
RIMS2	8:104778688	c.621T>C	H207	ENST00000406091
RIMS2	8:104973324	c.2067T>C	S689	ENST00000436393
RIMS2	8:104987663	c.2190A>C	S730	ENST00000436393
RIMS2	8:104927794	c.1218A>G	L406	ENST00000436393
RIMS2	8:105261749	c.3678A>G	G1226	ENST00000436393
RIMS2	8:104709326	c.297G>A	Q99	ENST00000402998
RIMS2	8:104897850	c.357T>C	R119	ENST00000436393
RIMS2	8:104948947	c.1878C>T	G626	ENST00000436393
RIMS2	8:104897619	c.126C>T	T42	ENST00000436393
RIMS2	8:105261005	c.3607C>T	L1203	ENST00000436393
RIMS2	8:104898414	c.921T>C	D307	ENST00000436393
RIMS2	8:104973342	c.2085T>C	D695	ENST00000436393
RIMS2	8:104709458	c.429C>T	N143	ENST00000402998
RIMS2	8:105263946	c.4002C>T	F1334	ENST00000436393
RIMS2	8:104778598	c.531G>A	Q177	ENST00000406091
RIMS2	8:105257166	c.3411G>A	R1137	ENST00000436393
RIMS2	8:104922429	c.1026G>A	L342	ENST00000436393
RIMS2	8:105260938	c.3540C>T	F1180	ENST00000436393
RIMS2	8:104927725	c.1149T>G	V383	ENST00000436393
RIMS2	8:105026827	c.2538G>A	K846	ENST00000436393
RIMS2	8:104987645	c.2172A>G	S724	ENST00000436393
RIMS2	8:105257214	c.3459G>A	R1153	ENST00000436393
RIMS2	8:104709350	c.213G>A	Q71	ENST00000406091
RIMS2	8:105261767	c.3696C>T	I1232	ENST00000436393
RIMS2	8:104778670	c.603G>A	V201	ENST00000406091
RIMS2	8:105263289	c.3783C>T	V1261	ENST00000436393
RIMS2	8:105260951	c.3553T>C	L1185	ENST00000436393
RIMS2	8:104940099	c.1560T>G	P520	ENST00000436393
RIMS2	8:105026758	c.2469C>T	V823	ENST00000436393
RIMS2	8:105263871	c.3927T>G	S1309	ENST00000436393
RNF38	9:36344831	c.1383T>C	T461	ENST00000259605
RNF38	9:36357880	c.630T>C	I210	ENST00000259605
RNF38	9:36369716	c.570G>A	Q190	ENST00000259605
RNF38	9:36390535	c.91C>T	L31	ENST00000259605
RNF38	9:36390467	c.159C>T	F53	ENST00000259605
RPGR	X:38182653	c.153C>T	T51	ENST00000378505
SCARA5	8:27737165	c.1272G>A	K424	ENST00000354914
SCARA5	8:27823961	c.211C>T	L71	ENST00000354914
SCARA5	8:27779539	c.465G>A	G155	ENST00000354914
SCARA5	8:27737144	c.1293C>T	C431	ENST00000354914
SCN2A	2:166245650	c.5334C>T	N1778	ENST00000375427
SCN2A	2:166210935	c.3153C>T	S1051	ENST00000375427
SCN2A	2:166231200	c.3978T>C	V1326	ENST00000375427
SCN2A	2:166170495	c.1260C>A	I420	ENST00000375427
SCN2A	2:166229828	c.3943A>C	R1315	ENST00000375427
SCN2A	2:166164373	c.402C>A	L134	ENST00000375427
SCN2A	2:166201220	c.2718C>T	S906	ENST00000375427
SCN2A	2:166170262	c.1167T>G	L389	ENST00000375427
SCN2A	2:166245158	c.4842G>C	L1614	ENST00000375427
SCN2A	2:166229740	c.3855A>G	S1285	ENST00000375437
SCN2A	2:166166894	c.759C>A	I253	ENST00000375427
SCN2A	2:166201317	c.2815C>T	L939	ENST00000375427
SCN2A	2:166152459	c.126G>A	K42	ENST00000375427
SCN2A	2:166211175	c.3393C>T	S1131	ENST00000375427
SCN2A	2:166201304	c.2802C>A	I934	ENST00000375437
SCN2A	2:166187937	c.2247A>G	K749	ENST00000375427
SCN2A	2:166221661	c.3408T>C	N1136	ENST00000375437
SCN2A	2:166152501	c.168G>A	L56	ENST00000375427
SCN2A	2:166165188	c.489A>G	T163	ENST00000375427
SCN2A	2:166165901	c.645G>C	A215	ENST00000375437
SCN2A	2:166170618	c.1383G>A	Q461	ENST00000375427
SCN2A	2:166170591	c.1356G>A	Q452	ENST00000375427
SCN2A	2:166201121	c.2619C>T	I873	ENST00000375427
SCN2A	2:166152597	c.264G>A	K88	ENST00000375427
SCN2A	2:166179728	c.1734C>T	F578	ENST00000375427
SCN2A	2:166170157	c.1062G>A	V354	ENST00000375427
SCN2A	2:166245684	c.5368C>T	L1790	ENST00000375427
SCN2A	2:166187934	c.2244G>A	V748	ENST00000375427
SCN2A	2:166201289	c.2787C>T	F929	ENST00000375427
SCN2A	2:166179938	c.1944G>A	V648	ENST00000375427
SCN2A	2:166243507	c.4803G>A	V1601	ENST00000375427
SCN2A	2:166172127	c.1530G>A	Q510	ENST00000375427
SCN2A	2:166166906	c.771C>T	F257	ENST00000375427
SCN2A	2:166229797	c.3912C>T	S1304	ENST00000375427
SCN2A	2:166245404	c.5088C>T	N1696	ENST00000375427
SCN2A	2:166245809	c.5493A>T	I1831	ENST00000375427
SCN2A	2:166165865	c.609T>C	Y203	ENST00000375437
SCN2A	2:166170516	c.1281C>A	A427	ENST00000375427
SCN2A	2:166152444	c.111C>A	P37	ENST00000375427
SCN2A	2:166229818	c.3933G>A	L1311	ENST00000375427
SFRP1	8:41122839	c.792C>T	L264	ENST00000220772
SFRP1	8:41166484	c.195G>T	L65	ENST00000220772
SFRP1	8:41166145	c.534C>T	S178	ENST00000220772
SFRP1	8:41122947	c.684G>A	K228	ENST00000220772
SFRP1	8:41122983	c.648G>A	V216	ENST00000220772
SLC26A5	7:103050961	c.606C>T	A202	ENST00000306312
SLC26A5	7:103050847	c.720C>A	I240	ENST00000306312
SLC26A5	7:103033456	c.1029C>T	A343	ENST00000306312
SLC26A5	7:103053516	c.336C>G	G112	ENST00000306312
SLC26A5	7:103018052	c.1980G>T	L660	ENST00000306312
SLC26A5	7:103017286	c.2010C>A	V670	ENST00000306312
SLC26A5	7:103029841	c.1342C>T	L448	ENST00000306312
SOAT2	12:53509913	c.741G>A	L247	ENST00000301466
SOAT2	12:53512198	c.843C>A	I281	ENST00000301466
SOAT2	12:53509273	c.543G>A	P181	ENST00000301466
SOAT2	12:53517624	c.1485G>A	E495	ENST00000301466
SOAT2	12:53516963	c.1335C>T	F445	ENST00000301466
SOAT2	12:53517580	c.1441C>T	L481	ENST00000301466
SP9	2:175201953	c.1140G>A	Q380	ENST00000394967
SVEP1	9:113168448	c.9432G>A	V3144	ENST00000401783
SVEP1	9:113312283	c.633G>A	L211	ENST00000401783
SVEP1	9:113173811	c.6180C>A	L2060	ENST00000401783
SVEP1	9:113212500	c.3942C>T	N1314	ENST00000401783
SVEP1	9:113163182	c.9774C>A	T3258	ENST00000401783
SVEP1	9:113312262	c.654C>T	I218	ENST00000401783
SVEP1	9:113219609	c.3600C>T	N1200	ENST00000401783
SVEP1	9:113198675	c.4749C>T	V1583	ENST00000401783
SVEP1	9:113205823	c.4641T>C	G1547	ENST00000302728
SVEP1	9:113275327	c.1182C>T	C394	ENST00000401783
SVEP1	9:113166751	c.9522C>A	I3174	ENST00000401783
SVEP1	9:113276235	c.1116C>A	T372	ENST00000401783
SVEP1	9:113251994	c.1866C>T	I622	ENST00000302728
SVEP1	9:113171088	c.6792T>C	C2264	ENST00000401783
SVEP1	9:113241933	c.2469G>A	E823	ENST00000401783
SVEP1	9:113163140	c.9816A>G	E3272	ENST00000401783
SVEP1	9:113163284	c.9672T>C	D3224	ENST00000401783
SVEP1	9:113170491	c.7389C>A	L2463	ENST00000401783
SVEP1	9:113265469	c.1332G>A	P444	ENST00000401783
SVEP1	9:113341605	c.219G>T	R73	ENST00000401783
SVEP1	9:113341377	c.447G>A	K149	ENST00000401783
SVEP1	9:113137703	c.10545G>A	V3515	ENST00000401783
SVEP1	9:113228155	c.3312T>C	S1104	ENST00000401783
SVEP1	9:113170152	c.7728C>T	A2576	ENST00000401783
SVEP1	9:113166682	c.9591C>T	F3197	ENST00000401783
SVEP1	9:113231323	c.3057G>A	R1019	ENST00000401783
SVEP1	9:113169003	c.8877C>T	F2959	ENST00000401783
SVEP1	9:113194887	c.5088G>A	L1696	ENST00000401783
SVEP1	9:113212422	c.4020C>T	T1340	ENST00000401783
SVEP1	9:113173478	c.6513C>T	S2171	ENST00000401783
SVEP1	9:113170146	c.7734C>T	I2578	ENST00000401783
SVEP1	9:113241924	c.2478G>A	L826	ENST00000401783
SVEP1	9:113198674	c.4750C>T	L1584	ENST00000401783
SVEP1	9:113171163	c.6717A>C	G2239	ENST00000401783
SVEP1	9:113312259	c.657C>T	F219	ENST00000401783
SVEP1	9:113170530	c.7350C>A	I2450	ENST00000401783
SVEP1	9:113221386	c.3330T>C	C1110	ENST00000401783
SVEP1	9:113276307	c.1044C>T	H348	ENST00000401783
SVEP1	9:113312184	c.732C>T	Y244	ENST00000401783
SVEP1	9:113168736	c.9144C>T	A3048	ENST00000401783
TMEM130	7:98452934	c.732C>A	G244	ENST00000339375
TMEM130	7:98446275	c.1050C>T	I350	ENST00000416379
TMEM200A	6:130762335	c.768C>T	G256	ENST00000296978
TMEM200A	6:130762056	c.489C>A	I163	ENST00000296978
TMEM200A	6:130761936	c.369T>C	D123	ENST00000296978
TMEM200A	6:130761678	c.111G>A	K37	ENST00000296978
TMEM200A	6:130762623	c.1056G>A	G352	ENST00000296978
TMEM200A	6:130761675	c.108G>A	E36	ENST00000296978
TMEM200A	6:130762386	c.819G>A	K273	ENST00000296978
TMEM200A	6:130762050	c.483G>A	R161	ENST00000296978
TMEM200A	6:130761987	c.420C>T	F140	ENST00000296978
TMEM200A	6:130762578	c.1011C>T	S337	ENST00000296978
TMEM200A	6:130761981	c.414C>T	F138	ENST00000296978
TMEM200A	6:130763037	c.1470G>A	R490	ENST00000296978
TMEM200A	6:130762848	c.1281C>T	S427	ENST00000296978
TMEM67	8:94784853	c.688T>C	L230	ENST00000453321
TMEM67	8:94821184	c.2556G>A	R852	ENST00000453321
TMEM67	8:94827622	c.2854T>C	L952	ENST00000453321
TMEM67	8:94817076	c.2409A>G	E803	ENST00000453321
TMEM67	8:94827549	c.2781C>T	F927	ENST00000453321
TMEM67	8:94792928	c.822C>T	I274	ENST00000453321
TMEM67	8:94793189	c.957C>T	F319	ENST00000453321
TMEM67	8:94822081	c.2730C>T	F910	ENST00000453321
TMEM67	8:94807651	c.1689C>T	F563	ENST00000453321
TNRC18	7:5399197	c.4665G>A	L1555	ENST00000430969
TNRC18	7:5391556	c.5364G>C	L1788	ENST00000430969
TNRC18	7:5434072	c.342A>G	E114	ENST00000430969
TNRC18	7:5396761	c.4980G>T	G1660	ENST00000430969
TNRC18	7:5391724	c.5196T>C	N1732	ENST00000430969
TNRC18	7:5402371	c.4305G>A	G1435	ENST00000430969
TNRC18	7:5401284	c.4602C>T	H1534	ENST00000430969
TNRC18	7:5352548	c.7974A>C	S2658	ENST00000430969
TNRC18	7:5352179	c.8343C>T	F2781	ENST00000430969
TNRC18	7:5391481	c.5439C>T	F1813	ENST00000430969
TNRC18	7:5355600	c.6849C>T	D2283	ENST00000430969
TNRC18	7:5396806	c.4935C>T	P1645	ENST00000430969
TNRC18	7:5348943	c.8445C>T	G2815	ENST00000430969
TP53	17:7577143	c.795G>A	L265	ENST00000269305
TP53	17:7577065	c.873G>A	K291	ENST00000269305
TP53	17:7579330	c.357C>G	A119	ENST00000269305
TP53	17:7579396	c.291C>T	V97	ENST00000269305
TP53	17:7577588	c.693C>T	T231	ENST00000269305
TP53	17:7576886	c.960G>A	K320	ENST00000269305
TPD52L3	9:6328916	c.321G>A	R107	ENST00000344545
TRIM10	6:30128594	c.42C>A	V14	ENST00000449742
TRIM10	6:30122115	c.1077C>T	G359	ENST00000449742
TRIM10	6:30128312	c.324C>T	F108	ENST00000449742
TRIM10	6:30124759	c.852C>T	P284	ENST00000449742
TRIOBP	22:38111850	c.537G>A	R179	ENST00000406386
TRIOBP	22:38167740	c.6933G>A	Q2311	ENST00000406386
TRIOBP	22:38164106	c.6498C>T	Y2166	ENST00000406386
TRIOBP	22:38151143	c.5523C>T	S1841	ENST00000406386
TRIOBP	22:38121671	c.3108C>T	D1036	ENST00000406386
TRIOBP	22:38150944	c.5440C>T	L1814	ENST00000406386
TTN	2:179640414	c.6177C>A	I2059	ENST00000342992
TTN	2:179469435	c.46677G>C	G15559	ENST00000342992
TTN	2:179417111	c.82812G>A	L27604	ENST00000342992
TTN	2:179431833	c.71322G>T	V23774	ENST00000342992
TTN	2:179588746	c.17508G>A	E5836	ENST00000342992
TTN	2:179596445	c.13425C>T	I4475	ENST00000342992
TTN	2:179477578	c.42166C>A	R14056	ENST00000342992
TTN	2:179589084	c.17286G>A	R5762	ENST00000342992
TTN	2:179588692	c.17562C>G	V5854	ENST00000342992
TTN	2:179468880	c.46830C>T	R15610	ENST00000342992
TTN	2:179597327	c.12729C>T	N4243	ENST00000342992
TTN	2:179569097	c.26268G>C	L8756	ENST00000342992
TTN	2:179479656	c.40974C>T	A13658	ENST00000342992
TTN	2:179587200	c.18582C>A	L6194	ENST00000342992
TTN	2:179468913	c.46797T>C	P15599	ENST00000342992
TTN	2:179473134	c.44772T>C	N14924	ENST00000342992
TTN	2:179476280	c.42972T>C	C14324	ENST00000342992
TTN	2:179471857	c.45768C>T	I15256	ENST00000342992
TTN	2:179498764	c.34758A>G	K11586	ENST00000342992
TTN	2:179448473	c.57732C>T	H19244	ENST00000342992
TTN	2:179410767	c.87492G>A	P29164	ENST00000342992
TTN	2:179485012	c.38532C>T	C12844	ENST00000342992
TTN	2:179498195	c.35187C>T	G11729	ENST00000342992
TTN	2:179396156	c.97482T>C	Y32494	ENST00000342992
TTN	2:179463964	c.48852C>T	G16284	ENST00000342992
TTN	2:179413638	c.85011C>T	G28337	ENST00000342992
TTN	2:179579894	c.22287C>T	H7429	ENST00000342992
TTN	2:179410161	c.87972T>C	S29324	ENST00000342992
TTN	2:179476178	c.43074G>C	L14358	ENST00000342992
TTN	2:179425302	c.77853T>C	N25951	ENST00000342992
TTN	2:179484535	c.38805C>G	L12935	ENST00000342992
TTN	2:179482768	c.39606G>A	V13202	ENST00000342992
TTN	2:179579852	c.22329G>A	K7443	ENST00000342992
TTN	2:179479455	c.41082G>A	V13694	ENST00000342992
TTN	2:179462437	c.49668C>G	V16556	ENST00000342992
TTN	2:179410173	c.87960A>G	A29320	ENST00000342992
TTN	2:179424573	c.78582G>A	K26194	ENST00000342992
TTN	2:179424576	c.78579G>A	R26193	ENST00000342992
TTN	2:179391859	c.100152C>T	D33384	ENST00000342992
TTN	2:179467112	c.47313G>C	L15771	ENST00000342992
TTN	2:179501396	c.33354G>A	V11118	ENST00000342992
TTN	2:179429007	c.74148C>G	V24716	ENST00000342992
TTN	2:179407639	c.89238G>A	K29746	ENST00000342992
TTN	2:179641473	c.5118G>A	K1706	ENST00000342992
TTN	2:179410818	c.87441C>A	L29147	ENST00000342992
TTN	2:179421849	c.80328C>A	I26776	ENST00000342992
TTN	2:179478885	c.41535C>A	T13845	ENST00000342992
TTN	2:179402568	c.91662C>T	C30554	ENST00000342992
TTN	2:179426832	c.76323C>T	V25441	ENST00000342992
TTN	2:179455159	c.53589C>A	A17863	ENST00000342992
TTN	2:179412801	c.85848C>T	F28616	ENST00000342992
TTN	2:179423351	c.79131A>G	P26377	ENST00000342992
TTN	2:179447704	c.58122T>C	S19374	ENST00000342992
TTN	2:179476304	c.42948C>A	I14316	ENST00000342992
TTN	2:179481733	c.40179A>C	P13393	ENST00000342992
TTN	2:179594650	c.14598G>A	K4866	ENST00000342992
TTN	2:179595482	c.14046G>A	K4682	ENST00000342992
TTN	2:179623847	c.10167C>T	F3389	ENST00000342992
TTN	2:179477786	c.41958C>A	P13986	ENST00000342992
TTN	2:179501150	c.33600C>A	T11200	ENST00000342992
TTN	2:179643819	c.3990C>T	R1330	ENST00000342992
TTN	2:179413968	c.84681C>A	V28227	ENST00000342992
TTN	2:179399813	c.93819G>A	K31273	ENST00000356127
TTN	2:179425602	c.77553C>T	D25851	ENST00000342992
TTN	2:179399936	c.93702C>A	V31234	ENST00000342992
TTN	2:179463539	c.49194C>A	I16398	ENST00000342992
TTN	2:179575835	c.24396A>G	T8132	ENST00000342992
TTN	2:179575973	c.24258C>A	I8086	ENST00000342992
TTN	2:179623811	c.10203G>T	L3401	ENST00000342992
TTN	2:179443654	c.60399C>A	T20133	ENST00000342992
TTN	2:179472162	c.45549T>C	G15183	ENST00000342992
TTN	2:179458404	c.50919T>G	V16973	ENST00000342992
TTN	2:179470313	c.46005T>C	R15335	ENST00000342992
TTN	2:179428758	c.74397T>C	L24799	ENST00000342992
TTN	2:179428917	c.74238A>G	K24746	ENST00000342992
TTN	2:179641893	c.4797T>C	H1599	ENST00000342992
TTN	2:179639058	c.6933A>G	K2311	ENST00000342992
TTN	2:179438798	c.64357A>C	R21453	ENST00000342992
TTN	2:179634515	c.8793G>A	V2931	ENST00000342992
TTN	2:179434059	c.69096C>T	D23032	ENST00000342992
TTN	2:179458352	c.50971C>T	L16991	ENST00000342992
TTN	2:179472399	c.45312G>T	V15104	ENST00000342992
TTN	2:179413566	c.85083A>G	A28361	ENST00000342992
TTN	2:179436930	c.66225T>C	D22075	ENST00000342992
TTN	2:179458785	c.50631G>A	E16877	ENST00000342992
TTN	2:179535833	c.31389A>G	K10463	ENST00000342992
TTN	2:179596508	c.13362G>A	K4454	ENST00000342992
TTN	2:179406220	c.89874C>A	G29958	ENST00000356127
TTN	2:179595380	c.14148A>G	S4716	ENST00000342992
TTN	2:179485147	c.38397T>C	D12799	ENST00000342992
TTN	2:179599284	c.11535A>G	G3845	ENST00000342992
TTN	2:179424330	c.78819A>G	L26273	ENST00000356127
TTN	2:179631337	c.9474C>A	V3158	ENST00000342992
TTN	2:179632555	c.9402C>T	N3134	ENST00000342992
TTN	2:179633572	c.8991C>A	I2997	ENST00000342992
TTN	2:179466236	c.47784C>T	C15928	ENST00000356127
TTN	2:179641986	c.4704G>A	K1568	ENST00000342992
TTN	2:179414325	c.84420T>G	S28140	ENST00000342992
TTN	2:179481953	c.40065A>G	G13355	ENST00000342992
TTN	2:179499952	c.34260C>T	I11420	ENST00000342992
TTN	2:179401681	c.92451C>A	I30817	ENST00000342992
TTN	2:179435163	c.67992T>C	D22664	ENST00000342992
TTN	2:179571348	c.25521C>T	G8507	ENST00000342992
TTN	2:179426604	c.76551C>T	C25517	ENST00000342992
TTN	2:179391829	c.100182G>A	Q33394	ENST00000342992
TTN	2:179560082	c.27531T>A	P9177	ENST00000342992
TTN	2:179392306	c.99837A>G	A33279	ENST00000356127
TTN	2:179480486	c.40638C>T	F13546	ENST00000356127
TTN	2:179633488	c.9075G>T	L3025	ENST00000342992
TTN	2:179664456	c.672G>A	K224	ENST00000342992
TTN	2:179402121	c.92103G>A	Q30701	ENST00000356127
TTN	2:179593688	c.15345T>C	S5115	ENST00000342992
TTN	2:179411072	c.87282C>A	V29094	ENST00000342992
TTN	2:179477756	c.41988C>T	G13996	ENST00000342992
TTN	2:179437617	c.65538T>C	P21846	ENST00000342992
TTN	2:179634827	c.8601G>A	V2867	ENST00000342992
TTN	2:179447818	c.58008A>T	L19336	ENST00000342992
TTN	2:179595296	c.14232A>G	T4744	ENST00000342992
TTN	2:179473535	c.44499C>A	I14833	ENST00000342992
TTN	2:179405009	c.90180A>T	G30060	ENST00000342992
TTN	2:179414804	c.84057A>G	R28019	ENST00000342992
TTN	2:179664360	c.768G>A	R256	ENST00000342992
TTN	2:179428026	c.75129A>G	E25043	ENST00000342992
TTN	2:179433486	c.69669C>T	A23223	ENST00000342992
TTN	2:179599140	c.11679T>C	F3893	ENST00000342992
TTN	2:179400188	c.93450C>T	G31150	ENST00000342992
TTN	2:179449076	c.57498C>A	I19166	ENST00000342992
TTN	2:179396621	c.97017C>A	I32339	ENST00000342992
TTN	2:179490118	c.36726C>A	V12242	ENST00000342992
TTN	2:179495846	c.36225C>T	I12075	ENST00000342992
TTN	2:179468997	c.46713C>T	F15571	ENST00000342992
TTN	2:179466140	c.47880A>G	K15960	ENST00000356127
TTN	2:179466155	c.47865A>G	G15955	ENST00000356127
TTN	2:179644742	c.3714T>G	T1238	ENST00000356127
TTN	2:179409091	c.88155G>A	Q29385	ENST00000356127
TTN	2:179581904	c.21825C>A	G7275	ENST00000356127
TTN	2:179495591	c.36390C>A	I12130	ENST00000356127
TTN	2:179499208	c.34596C>A	I11532	ENST00000356127
TTN	2:179418029	c.81888A>G	R27296	ENST00000356127
TTN	2:179486022	c.37719C>T	C12573	ENST00000356127
TTN	2:179583913	c.20472C>T	C6824	ENST00000356127
TTN	2:179594836	c.14559C>A	A4853	ENST00000356127
TTN	2:179477522	c.42222T>A	P14074	ENST00000356127
TTN	2:179542421	c.30486T>C	P10162	ENST00000342992
TTN	2:179422501	c.79876A>C	R26626	ENST00000342992
TTN	2:179669343	c.27G>A	T9	ENST00000342992
TTN	2:179404446	c.90636C>T	G30212	ENST00000356127
TTN	2:179404590	c.90492A>G	P30164	ENST00000356127
TTN	2:179430354	c.72795C>A	V24265	ENST00000356127
TTN	2:179449091	c.57477G>A	E19159	ENST00000356127
TTN	2:179585317	c.19440A>G	E6480	ENST00000356127
TTN	2:179469489	c.27507G>A	R9169	ENST00000359218
TTN	2:179424792	c.78357A>G	E26119	ENST00000356127
TTN	2:179499181	c.34623T>C	L11541	ENST00000342992
TTN	2:179594277	c.14874C>A	I4958	ENST00000342992
TTN	2:179576879	c.23946C>T	C7982	ENST00000342992
TTN	2:179643639	c.4170G>T	P1390	ENST00000342992
TTN	2:179634899	c.8529C>A	V2843	ENST00000342992
TTN	2:179621199	c.10491C>T	D3497	ENST00000342175
TTN	2:179500868	c.33726G>T	V11242	ENST00000342992
TTN	2:179429385	c.54654T>C	P18218	ENST00000359218
TTN	2:179615283	c.11844A>G	Q3948	ENST00000360870
TTN	2:179593063	c.15756T>C	S5252	ENST00000342992
TTN	2:179393789	c.79869C>A	L26623	ENST00000359218
TTN	2:179414007	c.65526C>A	V21842	ENST00000359218
TTN	2:179422227	c.60942C>A	I20314	ENST00000359218
TTN	2:179647040	c.3279G>A	L1093	ENST00000342992
TTN	2:179460379	c.49998G>T	V16666	ENST00000342992
TTN	2:179469465	c.46647C>A	V15549	ENST00000342992
TTN	2:179611704	c.15423C>T	D5141	ENST00000360870
TTN	2:179411818	c.86730A>G	E28910	ENST00000342992
TTN	2:179596523	c.13347C>T	S4449	ENST00000342992
TTN	2:179463972	c.48844C>T	L16282	ENST00000342992
TTN	2:179665290	c.415C>A	R139	ENST00000342992
TTN	2:179431803	c.71352A>G	L23784	ENST00000342992
TTN	2:179410949	c.87405C>T	V29135	ENST00000342992
TTN	2:179648462	c.2826A>G	P942	ENST00000342992
TTN	2:179584711	c.19926A>T	L6642	ENST00000342992
TTN	2:179430570	c.72585T>C	F24195	ENST00000342992
TTN	2:179431329	c.71826A>G	K23942	ENST00000342992
TTN	2:179648863	c.2709G>A	G903	ENST00000342992
TTN	2:179434029	c.69126C>A	V23042	ENST00000342992
TTN	2:179479401	c.41136C>A	A13712	ENST00000342992
TTN	2:179632624	c.9333C>G	V3111	ENST00000342992
TTN	2:179431323	c.71832C>T	I23944	ENST00000342992
TTN	2:179569457	c.26010T>C	D8670	ENST00000342992
TTN	2:179395577	c.98061T>G	S32687	ENST00000342992
TTN	2:179602984	c.10464G>A	Q3488	ENST00000342992
TTN	2:179437167	c.65988A>G	K21996	ENST00000342992
TTN	2:179644883	c.3573A>G	T1191	ENST00000342992
TTN	2:179400809	c.92961C>A	L30987	ENST00000342992
TTN	2:179500826	c.33768C>A	G11256	ENST00000342992
TTN	2:179442158	c.61200C>A	A20400	ENST00000342992
TTN	2:179464030	c.48786G>A	K16262	ENST00000342992
TTN	2:179431458	c.71697T>C	A23899	ENST00000342992
TTN	2:179393645	c.99129A>G	A33043	ENST00000342992
TTN	2:179416982	c.82941C>A	V27647	ENST00000342992
TTN	2:179455492	c.53256C>A	V17752	ENST00000342992
TTN	2:179581922	c.21807G>T	L7269	ENST00000342992
TTN	2:179399114	c.94524G>A	K31508	ENST00000342992
TTN	2:179499517	c.34380G>C	L11460	ENST00000342992
TTN	2:179437986	c.65169T>C	H21723	ENST00000342992
TTN	2:179457260	c.51768C>T	D17256	ENST00000342992
TTN	2:179458090	c.51141G>T	L17047	ENST00000342992
TTN	2:179659273	c.1251A>G	K417	ENST00000342992
TTN	2:179664420	c.708A>T	T236	ENST00000342992
TTN	2:179421741	c.80436C>T	G26812	ENST00000342992
TTN	2:179412489	c.86160G>A	L28720	ENST00000342992
TTN	2:179437674	c.65481T>C	Y21827	ENST00000342992
TTN	2:179643974	c.3945T>A	S1315	ENST00000342992
TTN	2:179397440	c.96198A>G	P32066	ENST00000342992
TTN	2:179643657	c.4152T>C	A1384	ENST00000342992
TTN	2:179465864	c.48063C>A	G16021	ENST00000342992
TTN	2:179398820	c.94818C>G	V31606	ENST00000342992
TTN	2:179579191	c.22578C>T	F7526	ENST00000342992
TTN	2:179425005	c.78150A>C	G26050	ENST00000342992
TTN	2:179628950	c.10068T>A	T3356	ENST00000356127
TTN	2:179399720	c.93912C>T	N31304	ENST00000356127
TTN	2:179436063	c.67092A>G	P22364	ENST00000342992
TTN	2:179629408	c.9834G>T	L3278	ENST00000342992
TTN	2:179654828	c.1815T>C	T605	ENST00000342992
TTN	2:179432535	c.70614G>A	Q23538	ENST00000356127
TTN	2:179631148	c.9663G>T	V3221	ENST00000342992
TTN	2:179477937	c.41895T>C	P13965	ENST00000342992
TTN	2:179399093	c.94545A>G	K31515	ENST00000342992
TTN	2:179436669	c.66480T>G	G22160	ENST00000356127
TTN	2:179588313	c.17782A>C	R5928	ENST00000342992
TTN	2:179413377	c.85272G>A	G28424	ENST00000342992
TTN	2:179596099	c.13662G>A	G4554	ENST00000342992
TTN	2:179600503	c.10938C>T	F3646	ENST00000342992
TTN	2:179571228	c.25641G>A	R8547	ENST00000342992
TTN	2:179664612	c.609G>A	K203	ENST00000342992
TTN	2:179457686	c.51456G>A	Q17152	ENST00000342992
TTN	2:179602902	c.10546C>T	L3516	ENST00000342992
TTN	2:179596517	c.13353G>A	Q4451	ENST00000342992
TTN	2:179665300	c.405G>A	V135	ENST00000342992
TTN	2:179401091	c.92679T>C	L30893	ENST00000342992
TTN	2:179498794	c.34728C>T	F11576	ENST00000342992
TTN	2:179444550	c.59670G>A	L19890	ENST00000342992
TTN	2:179638755	c.7140C>T	S2380	ENST00000342992
TTN	2:179410188	c.87945G>A	V29315	ENST00000342992
TTN	2:179659141	c.1383A>G	Q461	ENST00000342992
TTN	2:179414373	c.84372C>T	F28124	ENST00000342992
TTN	2:179434308	c.68847G>A	R22949	ENST00000342992
TTN	2:179407408	c.89469C>T	T29823	ENST00000342992
TTN	2:179436060	c.67095C>T	I22365	ENST00000342992
TTN	2:179474445	c.44001G>A	R14667	ENST00000342992
TTN	2:179498800	c.34722G>A	L11574	ENST00000342992
TTN	2:179567356	c.26526C>T	N8842	ENST00000342992
TTN	2:179665129	c.576G>A	L192	ENST00000342992
TTN	2:179425173	c.77982G>T	V25994	ENST00000342992
TTN	2:179410548	c.87711C>T	F29237	ENST00000342992
TTN	2:179481673	c.40239G>A	T13413	ENST00000342992
TTN	2:179598552	c.11832A>G	Q3944	ENST00000342992
TTN	2:179428764	c.74391G>A	K24797	ENST00000342992
TTN	2:179642597	c.4314C>T	S1438	ENST00000342992
TTN	2:179438868	c.64287C>T	F21429	ENST00000342992
TTN	2:179576846	c.23979C>T	S7993	ENST00000342992
TTN	2:179583666	c.20529G>A	V6843	ENST00000342992
TTN	2:179437206	c.65949C>T	I21983	ENST00000342992
TTN	2:179455117	c.53631C>T	F17877	ENST00000342992
TTN	2:179647693	c.2940C>T	D980	ENST00000342992
TTN	2:179477263	c.42285C>T	I14095	ENST00000342992
TTN	2:179458716	c.50700G>A	R16900	ENST00000342992
TTN	2:179477564	c.42180G>A	V14060	ENST00000342992
TTN	2:179640795	c.5796G>A	R1932	ENST00000342992
TTN	2:179647762	c.2871T>G	G957	ENST00000342992
TTN	2:179440704	c.62451G>A	L20817	ENST00000342992
TTN	2:179440911	c.62244C>T	I20748	ENST00000342992
TTN	2:179538385	c.30858A>G	K10286	ENST00000342992
TTN	2:179598099	c.12189C>T	Y4063	ENST00000342992
TTN	2:179434448	c.68707C>T	L22903	ENST00000342992
TTN	2:179584975	c.19662G>A	V6554	ENST00000342992
TTN	2:179485339	c.38205G>A	R12735	ENST00000342992
TTN	2:179598213	c.12075G>A	L4025	ENST00000342992
TTN	2:179588245	c.17850G>A	L5950	ENST00000342992
TTN	2:179432379	c.70776A>G	E23592	ENST00000342992
TTN	2:179589255	c.17115C>T	V5705	ENST00000342992
TTN	2:179641767	c.4824A>G	G1608	ENST00000342992
TTN	2:179582006	c.21723C>T	I7241	ENST00000342992
TTN	2:179576684	c.24141C>T	F8047	ENST00000342992
TTN	2:179404419	c.90669G>A	R30223	ENST00000342992
TTN	2:179413974	c.84675C>T	F28225	ENST00000342992
TTN	2:179454532	c.54216C>T	F18072	ENST00000342992
TTN	2:179495008	c.36537A>G	Q12179	ENST00000342992
TTN	2:179648797	c.2775G>A	K925	ENST00000342992
TTN	2:179458944	c.50472C>T	F16824	ENST00000342992
TTN	2:179581943	c.21786G>A	L7262	ENST00000342992
TTN	2:179632639	c.9318G>A	Q3106	ENST00000342992
TTN	2:179440104	c.63051G>A	V21017	ENST00000342992
TTN	2:179441542	c.61725T>C	P20575	ENST00000342992
TTN	2:179417696	c.82227G>A	K27409	ENST00000342992
TTN	2:179600731	c.10710C>T	F3570	ENST00000342992
TTN	2:179416538	c.83385G>A	K27795	ENST00000342992
TTN	2:179574561	c.24753C>T	F8251	ENST00000342992
TTN	2:179590353	c.16846C>T	L5616	ENST00000342992
TTN	2:179599176	c.11643T>G	S3881	ENST00000342992
TTN	2:179481736	c.40176A>G	E13392	ENST00000342992
TTN	2:179474943	c.43606C>T	L14536	ENST00000342992
TTN	2:179478906	c.41514G>A	K13838	ENST00000342992
TTN	2:179497112	c.35805C>T	L11935	ENST00000342992
TTN	2:179583311	c.20790G>A	V6930	ENST00000342992
TTN	2:179589042	c.17328C>T	F5776	ENST00000342992
TTN	2:179585898	c.19116T>C	A6372	ENST00000342992
TTN	2:179594491	c.14757C>T	F4919	ENST00000342992
TTN	2:179597667	c.12504C>T	A4168	ENST00000342992
TTN	2:179458812	c.50604G>A	K16868	ENST00000342992
TTN	2:179432670	c.70485C>T	F23495	ENST00000342992
TTN	2:179484958	c.38586C>T	I12862	ENST00000342992
TTN	2:179633410	c.9153T>C	L3051	ENST00000342992
TTN	2:179640501	c.6090C>T	L2030	ENST00000342992
TTN	2:179582272	c.21597C>T	S7199	ENST00000342992
TTN	2:179453449	c.55299G>A	E18433	ENST00000342992
TTN	2:179574513	c.24801C>T	F8267	ENST00000342992
TTN	2:179592958	c.15861C>T	C5287	ENST00000342992
TTN	2:179408103	c.88893C>T	V29631	ENST00000342992
TTN	2:179603068	c.10380G>A	R3460	ENST00000342992
TTN	2:179596691	c.13179T>C	P4393	ENST00000342992
TTN	2:179636071	c.7983G>A	L2661	ENST00000342992
TTN	2:179498297	c.35085C>T	F11695	ENST00000342992
TTN	2:179494052	c.36696G>A	G12232	ENST00000342992
TTN	2:179599705	c.11214C>T	S3738	ENST00000342992
TTN	2:179544115	c.29961G>A	E9987	ENST00000342992
TTN	2:179594268	c.14883G>A	L4961	ENST00000342992
TTN	2:179640441	c.6150G>A	K2050	ENST00000342992
TTN	2:179497428	c.35601C>A	P11867	ENST00000342992
TTN	2:179469522	c.46590C>T	T15530	ENST00000342992
TTN	2:179664453	c.675T>C	I225	ENST00000342992
TTN	2:179595812	c.13848C>T	G4616	ENST00000342992
TTN	2:179433243	c.69912T>A	V23304	ENST00000342992
TTN	2:179576075	c.24156G>A	E8052	ENST00000342992
TTN	2:179634647	c.8661C>T	T2887	ENST00000342992
TTN	2:179633539	c.9024C>T	I3008	ENST00000342992
TTN	2:179593492	c.15429C>T	I5143	ENST00000342992
TTN	2:179433237	c.69918T>C	N23306	ENST00000342992
TTN	2:179434590	c.68565C>T	F22855	ENST00000342992
TTN	2:179438970	c.64185G>A	K21395	ENST00000342992
TTN	2:179498037	c.35259G>A	V11753	ENST00000342992
TTN	2:179623868	c.10146G>A	K3382	ENST00000342992
TTN	2:179631247	c.9564C>T	F3188	ENST00000342992
TTN	2:179638758	c.7137C>T	V2379	ENST00000342992
TTN	2:179439960	c.63195G>A	L21065	ENST00000342992
TTN	2:179632510	c.9447C>T	I3149	ENST00000342992
TTN	2:179473616	c.44418C>T	I14806	ENST00000342992
TTN	2:179584810	c.19827C>T	L6609	ENST00000342992
TTN	2:179592435	c.16138T>C	L5380	ENST00000342992
TTN	2:179549115	c.28932C>T	T9644	ENST00000342992
TTN	2:179579825	c.22356C>T	F7452	ENST00000342992
TTN	2:179441825	c.61533G>A	K20511	ENST00000342992
TTN	2:179497688	c.35466C>T	F11822	ENST00000342992
TTN	2:179427744	c.75411C>A	P25137	ENST00000342992
TTN	2:179594515	c.14733C>T	S4911	ENST00000342992
TTN	2:179412371	c.86278C>T	L28760	ENST00000342992
TTN	2:179460364	c.50013C>T	T16671	ENST00000342992
TTN	2:179400176	c.93462C>A	T31154	ENST00000342992
TTN	2:179628974	c.10044C>T	I3348	ENST00000342992
TTN	2:179455759	c.52989G>A	L17663	ENST00000342992
TTN	2:179485285	c.38259C>T	F12753	ENST00000342992
TTN	2:179495831	c.36240G>A	L12080	ENST00000342992
TTN	2:179495927	c.36144G>A	V12048	ENST00000342992
TTN	2:179582476	c.21393C>T	F7131	ENST00000342992
TTN	2:179640777	c.5814C>T	V1938	ENST00000342992
TTN	2:179434605	c.68550C>T	T22850	ENST00000342992
TTN	2:179431635	c.71520C>T	N23840	ENST00000342992
TTN	2:179584144	c.20241G>A	L6747	ENST00000342992
TTN	2:179435844	c.67311C>T	D22437	ENST00000342992
TTN	2:179440965	c.62190C>T	I20730	ENST00000342992
TTN	2:179463874	c.48942C>T	F16314	ENST00000342992
TTN	2:179592079	c.16281G>A	K5427	ENST00000342992
TTN	2:179595317	c.14211G>A	L4737	ENST00000342992
TTN	2:179599320	c.11499C>T	F3833	ENST00000342992
TTN	2:179428836	c.74319G>T	R24773	ENST00000342992
TTN	2:179498381	c.35001G>A	V11667	ENST00000342992
TTN	2:179475004	c.43545C>T	V14515	ENST00000342992
TTN	2:179635022	c.8406G>A	K2802	ENST00000342992
TTN	2:179451422	c.56502C>T	I18834	ENST00000342992
TTN	2:179449136	c.57438C>T	V19146	ENST00000342992
TTN	2:179478624	c.41682C>T	I13894	ENST00000342992
TTN	2:179537423	c.30891G>A	K10297	ENST00000342992
TTN	2:179585251	c.19506G>A	K6502	ENST00000342992
TTN	2:179426007	c.77148C>T	I25716	ENST00000342992
TTN	2:179407830	c.89166G>A	E29722	ENST00000342992
TTN	2:179476172	c.43080G>A	V14360	ENST00000342992
TTN	2:179489358	c.36945G>A	V12315	ENST00000342992
TTN	2:179497989	c.35307C>T	H11769	ENST00000342992
TTN	2:179505290	c.32997G>A	R10999	ENST00000342992
TTN	2:179510666	c.32685G>A	E10895	ENST00000342992
TTN	2:179535006	c.31422G>A	K10474	ENST00000342992
TTN	2:179567368	c.26514G>A	K8838	ENST00000342992
TTN	2:179579281	c.22488G>A	K7496	ENST00000342992
TTN	2:179580269	c.22140C>T	A7380	ENST00000342992
TTN	2:179584156	c.20229C>T	F6743	ENST00000342992
TTN	2:179591878	c.16482C>T	F5494	ENST00000342992
TTN	2:179593736	c.15297G>A	V5099	ENST00000342992
TTN	2:179594181	c.14970G>A	K4990	ENST00000342992
TTN	2:179594905	c.14490C>T	A4830	ENST00000342992
TTN	2:179595335	c.14193C>T	F4731	ENST00000342992
TTN	2:179596633	c.13237C>T	L4413	ENST00000342992
TTN	2:179599149	c.11670C>T	I3890	ENST00000342992
TTN	2:179639748	c.6690C>T	F2230	ENST00000342992
TTN	2:179644778	c.3678G>A	R1226	ENST00000342992
TTN	2:179650431	c.2409C>T	V803	ENST00000342992
TTN	2:179666962	c.198G>A	T66	ENST00000342992
TTN	2:179666989	c.171C>T	S57	ENST00000342992
TTN	2:179498590	c.34932A>G	K11644	ENST00000342992
TTN	2:179495059	c.36486C>T	S12162	ENST00000342992
TTN	2:179401241	c.92529G>A	V30843	ENST00000342992
TTN	2:179399747	c.93891C>T	S31297	ENST00000342992
TTN	2:179458968	c.50448A>G	A16816	ENST00000342992
TTN	2:179481580	c.40332G>A	K13444	ENST00000342992
TTN	2:179597016	c.12948C>T	A4316	ENST00000342992
TTN	2:179598207	c.12081G>A	Q4027	ENST00000342992
TTN	2:179634791	c.8637G>A	V2879	ENST00000342992
TTN	2:179641608	c.4983C>T	I1661	ENST00000342992
TTN	2:179456835	c.52092G>A	K17364	ENST00000342992
TTN	2:179466861	c.47433C>T	F15811	ENST00000342992
TTN	2:179497392	c.35637C>T	I11879	ENST00000342992
TTN	2:179569031	c.26334C>T	F8778	ENST00000342992
TTN	2:179595338	c.14190C>T	A4730	ENST00000342992
TTN	2:179633554	c.9009G>A	K3003	ENST00000342992
TTN	2:179637975	c.7716C>T	I2572	ENST00000342992
TTN	2:179434020	c.69135C>T	I23045	ENST00000342992
TTN	2:179650797	c.2148G>A	E716	ENST00000342992
TTN	2:179410839	c.87420C>T	S29140	ENST00000342992
TTN	2:179424738	c.78417G>A	G26139	ENST00000342992
TTN	2:179429562	c.73593T>C	D24531	ENST00000342992
TTN	2:179434797	c.68358C>T	C22786	ENST00000342992
TTN	2:179665321	c.384T>C	T128	ENST00000342992
TTN	2:179665162	c.543C>T	S181	ENST00000342992
TTN	2:179474047	c.44286A>T	G14762	ENST00000342992
TTN	2:179667001	c.159C>T	G53	ENST00000342992
TTN	2:179412969	c.85680C>A	S28560	ENST00000342992
TTN	2:179437140	c.66015C>T	C22005	ENST00000342992
TTN	2:179456053	c.52695A>G	S17565	ENST00000342992
TTN	2:179456447	c.52395A>G	L17465	ENST00000342992
TTN	2:179462392	c.49713T>C	I16571	ENST00000342992
TTN	2:179495656	c.36325C>T	L12109	ENST00000342992
TTN	2:179592343	c.16230C>T	S5410	ENST00000342992
TTN	2:179606044	c.11403C>T	F3801	ENST00000342175
TTN	2:179407393	c.89484T>A	I29828	ENST00000342992
TTN	2:179440722	c.62433C>T	T20811	ENST00000342992
TTN	2:179604777	c.12670C>T	L4224	ENST00000342175
TTN	2:179407141	c.89638C>T	L29880	ENST00000342992
TTN	2:179634998	c.8430C>T	A2810	ENST00000342992
TTN	2:179418747	c.81387A>G	G27129	ENST00000342992
TTN	2:179446661	c.58731C>A	S19577	ENST00000342992
TTN	2:179567308	c.26574C>A	S8858	ENST00000342992
TTN	2:179596150	c.13611G>A	E4537	ENST00000342992
TTN	2:179638812	c.7083A>G	G2361	ENST00000342992
TTN	2:179647545	c.3088C>T	L1030	ENST00000342992
TTN	2:179485111	c.38433A>G	K12811	ENST00000342992
TTN	2:179452394	c.55938T>C	D18646	ENST00000342992
TTN	2:179404476	c.90612T>G	T30204	ENST00000342992
TTN	2:179422678	c.79699C>T	L26567	ENST00000342992
TTN	2:179569607	c.25959A>T	T8653	ENST00000342992
TTN	2:179599675	c.11244A>G	L3748	ENST00000342992
TTN	2:179427717	c.75438C>T	G25146	ENST00000342992
TTN	2:179497272	c.35757T>C	S11919	ENST00000342992
TTN	2:179616447	c.10680T>C	H3560	ENST00000360870
TTN	2:179590718	c.16599A>G	E5533	ENST00000342992
TTN	2:179594857	c.14538T>C	V4846	ENST00000342992
TTN	2:179400404	c.93234C>G	V31078	ENST00000342992
TTN	2:179583903	c.20482C>T	L6828	ENST00000342992
TTN	2:179604391	c.13056A>G	E4352	ENST00000342175
TTN	2:179483531	c.39042C>T	G13014	ENST00000342992
TTN	2:179433561	c.69594A>G	E23198	ENST00000342992
TTN	2:179650794	c.2151C>A	P717	ENST00000342992
TTN	2:179666974	c.186C>T	R62	ENST00000342992
TTN	2:179669304	c.66C>T	T22	ENST00000342992
TTN	2:179393870	c.98904C>G	V32968	ENST00000342992
TTN	2:179442423	c.61026A>G	G20342	ENST00000342992
TTN	2:179586740	c.18918A>G	K6306	ENST00000342992
TTN	2:179433786	c.69369T>C	D23123	ENST00000342992
TTN	2:179474565	c.43881G>A	K14627	ENST00000342992
TTN	2:179403929	c.91029G>A	K30343	ENST00000342992
TTN	2:179622543	c.10266C>A	I3422	ENST00000359218
TTN	2:179497730	c.35424C>T	I11808	ENST00000342992
TTN	2:179587113	c.18669T>C	T6223	ENST00000342992
TTN	2:179482573	c.39801C>T	A13267	ENST00000342992
TTN	2:179577067	c.23850C>A	S7950	ENST00000342992
TTN	2:179404371	c.90717C>T	D30239	ENST00000342992
TTN	2:179644787	c.3669C>A	A1223	ENST00000342992
TTN	2:179474920	c.43629C>A	L14543	ENST00000342992
TTN	2:179457374	c.51654G>A	L17218	ENST00000342992
UBE3B	12:109947443	c.1665C>T	F555	ENST00000434735
UBE3B	12:109928915	c.696T>G	A232	ENST00000434735
UBE3B	12:109945514	c.1596C>T	F532	ENST00000434735
UBE3B	12:109939239	c.1182C>T	I394	ENST00000434735
UBE3B	12:109936079	c.861C>T	F287	ENST00000434735
UBE3B	12:109962272	c.2532C>T	G844	ENST00000434735
UBE3B	12:109945401	c.1483C>T	L495	ENST00000434735
UBE3B	12:109940943	c.1398C>T	L466	ENST00000434735
UBE3B	12:109921443	c.87G>A	R29	ENST00000434735
UBE3B	12:109937445	c.948C>G	L316	ENST00000434735
UBE3B	12:109939197	c.1140G>A	L380	ENST00000434735
UPF3A	13:115048366	c.369C>T	D123	ENST00000375299
VWA5B2	3:183951051	c.396G>C	V132	ENST00000426955
VWA5B2	3:183953000	c.1005G>A	L335	ENST00000426955
VWA5B2	3:183952511	c.913C>T	L305	ENST00000426955
